# Supplementary material for: Accelerating simulations using Direct Relation Graphs foratmospheric chemistry mechanism reduction
Source: Copernicus journal article supplement (doi:10.5194/gmd-2018-106), 2018-04-20
Supplement: Supplementary file [file gmd-2018-106-AC2-supplement.pdf]

## Response to reviewer Maarten Crol

We thank the reviewer for his comments on our manuscript, and also for proof-reading the paper. We have carefully considered all of the reviewer's comments and revised the manuscript accordingly. These revisions have been highlighted using red-coloured fonts and are referred to appropriately in our specific response below.

We would like to note that the aim of this study is to introduce a general framework for developing skeletal chemistry. Our interest here, is in the lower levels of the troposphere in regions of heavy pollution which lead to ozone formation, hence the choice of the high VOC/NO<sub>x</sub> conditions for developing the skeletal chemistry. At the same time, such conditions activate a large number of VOC-relevant reactions which are of interest to us. Furthermore, additional validation in the revised manuscript indicates that the reduction process is not particularly sensitive to the VOC/NO<sub>x</sub> ratio as the reviewer suggests. The methodology/tools described in this study are general, and are expected to be applied by different groups on a case-specific basis. Furthermore, we would like to note that care has to be taken when using atmospheric chemical mechanisms. As indicated by Stockwell et al. [1], RACM is intended to be valid for the troposphere and not for the higher levels of the atmosphere. Thus, care has to be taken when interpreting results for the stratosphere, which in most regional models is not even being adequately resolved or modelled.

**1.** The reviewer raised concerns regarding the validation process, which is comprised of both box-model runs and air-quality forecast simulations using WRF-Chem. The reviewer also argues that "the choice of scenarios is not balanced for a true atmospheric simulation".

It is important to note, that atmospheric chemical mechanisms were developed/validated against limited sets of experimental smog-chamber data and box-model simulations only [2-9]. This good point was also stressed in the comments of this work by W. Stockwell (16/05/2018). Nevertheless, these mechanisms are used in air-quality forecast and climate simulations where substantially different conditions prevail. Chemical mechanisms are not typically validated using forecast/climate simulations, since it is extremely difficult to obtain accurate, real-time, satellite (or otherwise) measurements of all species present in a chemical mechanism throughout the entire atmosphere and compare with simulation results. Furthermore, validation of these mechanisms is typically conducted at atmospheric conditions only since varying solar radiation is the dominant factor driving and affecting atmospheric chemical reactions [2-9]. It is also important to note that, to the knowledge of the authors, this is the first study of its kind where both box-model and forecast simulations are used in tandem for validation purposes. From a validation point of view, doing forecast simulations covers a much larger sample space than what is traditionally covered in box-model simulations, examining the effects of both pressure and temperature variations.

**2.** The reviewer argues that only the lower nine levels were used for validation which is not representative of conditions in the upper atmosphere.

We would like to note that our interest in this study is in the lower levels of the troposphere where heavy pollution leads to ozone production, hence why the analysis was conducted for the lower levels in the atmosphere which covers the planetary boundary where most mixing processes occur. It is also important to note that regional air-quality forecasting codes such as WRF-Chem, are not usually tuned for the upper levels of the atmosphere. However, in the revised version of the manuscript, we have included additional error calculations using the upper levels of the troposphere where substantially different conditions (pressure, temperature, species mixing ratios) are found. The errors are shown in Figs. 13-18 for O<sub>3</sub>, CO and HCHO. These errors are of the same order of magnitude as for the lower levels of the

troposphere. For ozone, which is the target species, the errors are also found to be small (Figs.13 and 14) indicating the strength of the method. These results indicate that the skeletal mechanisms work even at these conditions, which are substantially different from the conditions used to develop the skeletal mechanism in the first place. Again, we stress the point that the most important parameter is variation in solar radiation (night-day).

**3.** The reviewer further mentions that emissions should be included for a “true validation”.

When validating a model one must first limit to the extent possible any external influences/uncertainties which would otherwise bias the model’s predictions, thus over-shadowing the actual performance of the model. Emissions inventories for atmospheric chemistry, contain many uncertainties. Modelling emissions is a challenge alone, and emissions inventories as used in forecasting codes have many inter-dependencies (mesh resolution, chemical mechanism, appropriate speciation profiling of chemical compounds etc.). Ground-based stations are finite, and global models run on much coarser meshes than forecast codes hence dynamical downscaling is also an issue. In such a case, one would not be able to deduce whether the errors are due to the reduction process, or due to the uncertainties/errors in the emissions inventories used. For this reason, we chose to turn emissions off, in order to clearly evaluate the performance of the reduced mechanism i.e. free from emissions’ modelling uncertainties, in a first step. This is now discussed in the revised version of the manuscript on page 9.

**4.** The reviewer mentions that the mechanisms were developed for polluted conditions only, and it is unclear whether they would work equally well for other conditions.

The set of conditions used, were taken from the study of Heard et al. [3] who used the same conditions for developing reduced chemistry for CBM-EX with overall good results. The reason we use such high VOC/NO<sub>x</sub> conditions is because we are interested in near-surface ozone production where such conditions are typical of polluted environments. The method described in this study is general and can be applied for developing skeletal chemistry for specific conditions of interest. Furthermore, we have conducted box-model runs for low VOC/NO<sub>x</sub> conditions and these are included as a new figure (Fig. 5) in the revised manuscript. Even though the skeletal mechanism was developed for high VOC/NO<sub>x</sub>, the results in Fig. 5 show that it performs reasonable well even for lower VOC/NO<sub>x</sub> conditions. We have additionally conducted validation as per point 2 above where substantially different conditions prevail.

**5.** The reviewer argues that initial and boundary conditions are unclear.

Initial and boundary conditions for the meteorological fields are discussed in the manuscript. For the chemistry, the model is using idealised climatological-based conditions details of which can be found in the WRF-Chem manual. We are unsure of what the reviewer means by “standard value everywhere” in the supplement. The initial conditions are fixed to a constant value for some species (e.g. CO), while for other species they vary with spatial position. On the boundaries, zero-gradient (to match values inside domain) or fixed value conditions are used depending on the local flow direction (open system). It is also important to note that the analysis is conducted after a 5-day spin-up time. By this time, the fields have reached a mature state. In the study of Ritter et al [9], the effect of using the hard-coded chemical boundary conditions and user-specified ones were compared, by running WRF-Chem simulations. Although some differences were found in ozone concentration profiles between the two simulations, the profiles obtained were clearly in correlation with each other, of the same order of magnitude, and the differences were well within experimental/measurement errors for the species mixing ratios.

### Further comments:

P4, L5:

Acronyms are used to avoid using the full sentence, otherwise the text would be full of the repeating sentences.

P4, L5:

As explained in the text, this is the net rate of a species from a given reaction. The net rate of a species from a reaction, can be positive or negative, depending on the difference between the stoichiometric coefficients of the species, and the rate of the reaction. Note that the general case may involve reactions with reverse rates. We refer the reviewer to published studies on the matter in the literature e.g. Pepiot-Desjardins and Pitsch. *Combust. Flame* 154 (2008) 67-81, K. Niemeyer, C. Sung, M. Raju. *Combust. Flame* 157 (2010) 17601770, T. Lu, C. Law. *Proc. Combust. Inst.* 30 (2005) 13331341.

P4, L25:

The max function is needed because the net rate can be positive or negative. The function in Eq. 3 ensures that positive net rates are identified as production terms, while negative net rates are identified as destruction terms, as per the DRGEP method. We refer the reviewer to published studies on the matter in the literature e.g. Pepiot-Desjardins and Pitsch. *Combust. Flame* 154 (2008) 67-81, K. Niemeyer, C. Sung, M. Raju. *Combust. Flame* 157 (2010) 17601770, T. Lu, C. Law. *Proc. Combust. Inst.* 30 (2005) 13331341.

P5, L14:

The example in Fig. 1 is a simple illustration of how the search algorithm works. The algorithm takes as input the overall interaction coefficients, which are calculated using Eq. 6. All that matters for the search are the overall interaction coefficients.

P7, L27:

In this study, the box-model runs were validated for a 48-hour period. However, in a forecast simulation, time-steps are of the order of minutes. E.g. after the operator split scheme, the mixing ratio values are updated and a new initial-value problem is solved, operator-splitting again and so on. So in essence, the reduced mechanism actually needs to be accurate over this smaller time range only, before the next initial-value problem is solved. This is now rephrased in the revised version of the manuscript.

### References

- [1] R.W. Stockwell, F. Kirchner, M. Kuhn, S. Seefeld. *J. Geoph. Res.* 102, (1997) 2584725879. A new mechanism for regional atmospheric chemistry modeling.
- [2] K.M. Emmerson and M.J. Evans. *Atm. Chem. Phys.* 9 (2009) 1831-1845. Comparison of tropospheric gas-phase chemistry schemes for use within global models.
- [3] A.C. Heard, M.J. Pilling, A.S. Tomlin. *Atm. Chem. Phys.* 32 (1998) 1059-1073. Mechanism reduction techniques applied to tropospheric chemistry.
- [4] J. Liang, M.Z. Jacobson. *Atm. Env.* 34 (2000) 3015-3026. Comparison of a 4000-reaction chemical mechanism with the carbon bond IV and an adjusted carbon bond IV-EX mechanism using SMVGEAR

## II.

- [5] L.E. Whitehouse, A.S. Tomlin, M.J. Pilling. *Atm. Chem. Phys.* 4 (2004) 2025-2056. Systematic reduction of complex tropospheric chemical mechanisms, Part I: sensitivity and time-scale analyses.
- [6] M.K. Neophytou, D.A. Goussis, M. van Loon, E. Mastorakos. *Atm. Env.* 38 (2004) 3661-3673. Reduced chemical mechanisms for atmospheric pollution using Computational Singular Perturbation analysis
- [7] M. Gerry, G. Whitten, J. Killus, M. Dodge. *J. Geoph. Res.* 94, (1989) 12925-12956. A photochemical kinetics mechanism for urban and regional scale computer modelling.
- [8] M.E. Jenkin, L.A. Watson, S.R. Utembe, D.E. Shallcross. *Atm. Env.* 42 (2008) 7185-7195. A Common Representative Intermediates (CRI) mechanism for VOC degradation. Part 1: Gas phase mechanism development.
- [9] M. Ritter, M.D. Muller, O. Jorba, E. Parlow, L.J. Sally Liu. *Meteorol. Atmos. Phys.* 119 (2013) 59-70. Impact of chemical and meteorological boundary and initial conditions on air quality modeling: WRF-Chem sensitivity evaluation for a European domain

## Response to reviewer William Stockwell

We thank the reviewer for his very useful and constructive comments. We have carefully considered all of the reviewer's comments and revised the manuscript accordingly. These revisions have been highlighted using green-coloured fonts and are referred to appropriately in our specific response below.

1. Indeed, we perfectly agree with the reviewer in that skeletal mechanisms have traditionally been developed not through a formal procedure such as the one proposed in this study. Starting from a detailed set of reactions one can (in principle) develop a number of different subset skeletal mechanisms for the specific application in mind. This is now made clear on page 11 of the revised manuscript.
2. As per the comments by M. Crol, we have now added additional validation for low VOC/NO<sub>x</sub> ratios and for the higher levels of the troposphere, where RACM is expected to be valid according to [1].
3. We thank the reviewer for the reference of Kaduwela et al. Indeed, there should be a formal and coordinated process of developing atmospheric chemical mechanisms. This is now discussed on page 11 of the revised manuscript.
4. We thank the reviewer for the reference of Heard et al. This work is discussed in the original manuscript on page 2. Indeed, most reduction methods were developed from the need to simulate efficiently combustion processes, however most reduction applications for atmospheric chemistry employ lumping and not methods such as DRGEP. We have tried to improve upon the discussion of previous work and we welcome any additional references from the reviewer for further improving this section.
5. *J* is now corrected on page 6 of the revised manuscript-we thank the reviewer for spotting this.

### **References:**

[1] R.W. Stockwell, F. Kirchner, M. Kuhn, S. Seefeld. J. Geoph. Res. 102, (1997) 25847-25879. A new mechanism for regional atmospheric chemistry modeling.

# Accelerating simulations using REDCHEM\_v0.0 for atmospheric chemistry mechanism reduction

Zacharias Marinou Nikolaou <sup>1</sup>, Jyh-Yuan Chen <sup>2</sup>, Yiannis Proestos <sup>3</sup>, Jos Lelieveld <sup>3,4</sup>, and Rolf Sander <sup>4</sup>

<sup>1</sup>Computation-based Science and Technology Research Center (CaSToRC), The Cyprus Institute, Nicosia, 2121, Cyprus.

<sup>2</sup>University of California at Berkeley, Department of Mechanical Engineering, 6163 Etcheverry Hall, Mailstop 1740, USA.

<sup>3</sup>Energy, Environment and Water Research Center (EEWRC), The Cyprus Institute, Nicosia, 2121, Cyprus.

<sup>4</sup>Max Planck Institute for Chemistry, Atmospheric Chemistry Department, 55128 Mainz, Germany.

**Correspondence:** Z.M Nikolaou (zacharias.nicolaou@cyi.ac.cy)

## Abstract.

Chemical mechanism reduction is common practice in combustion research for accelerating numerical simulations, however there have been limited applications in atmospheric chemistry. In this study, we employ a powerful reduction method in order to produce a skeletal mechanism of an atmospheric chemistry code that is commonly used in air quality and climate modelling.

5 The skeletal mechanism is developed using input data from a model scenario, and its performance is evaluated both a priori against the model scenario results, but also posteriori by implementing the skeletal mechanism in a chemistry-transport model namely the Weather Research and Forecasting code with Chemistry. Preliminary results, indicate a substantial increase in computational speedup for both cases, with a minimal loss of accuracy with regards to the **simulated** spatio-temporal mixing ratio of the target species, which was selected to be ozone.

## 10 1 Introduction

Atmospheric chemical mechanisms which are typically used in air quality research and forecasting codes, typically contain a large number of species and reactions. This poses a significant computational workload, which in some cases may account for more than 80% of the total simulation time (Dunker, 1986), **even with the advent of modern hybrid computer architectures (Christou et al., 2016)**. These mechanisms describe an important set of processes in the troposphere, for example the degradation of Volatile Organic Compounds (VOCs), and the formation of ozone (O<sub>3</sub>) the latter being a major oxidant and pollutant. As a result, mechanisms with varying levels of complexity are included in regional and global atmospheric chemistry codes, the overall performance of which depends strongly on the choice of chemical mechanism.

Apart from the large number of species **that** require solving at every point in the computational domain and for every time-step, there is a large disparity in the chemical time-scales of the interacting species (Sandu et al., 1997b). This results in a stiff system of non-linear equations for the reaction rates, which is computationally expensive to integrate, and which adds to the computational cost (Sandu et al., 1997a). Similar issues are encountered in the field of combustion research: detailed mechanisms describing the combustion of a fuel, contain hundreds of species and thousands of reactions. From a practical point of view however, one is usually interested in only a handful of important variables-in combustion this includes quantities

such as ignition delay time, laminar flame speed etc. while in atmospheric chemistry this includes ozone/NO<sub>x</sub> mixing ratios and so on. In both cases, the sensitivity to quantities of interest to certain species and reactions, can be minor in relation to dominant species and reactions. As a result, solving for all species in the detailed chemical mechanism might not actually be required in order to obtain accurate estimates of the target quantities. To this end, chemistry reduction techniques have been developed to reduce the dimensionality of the problem. In turn, this results in a reduction in the computational requirements associated with detailed-chemistry simulations and an acceleration of the simulation. Even though this is common practice in combustion research using a variety of methods (Turanyi et al., 1989; Peters and Rogg., 1993; Tomlin et al., 1997; Lam and Goussis, 1988; Mass and Pope., 1992; Pope, 1997; Lu and Law, 2005; Pepiot-Desjardins and Pitsch, 2008; Nikolaou et al., 2014, 2013; Niemeyer and Sung, 2011), chemistry reduction methods have seen limited use in comparison for atmospheric-chemistry applications.

The usual reduction process of a detailed chemical mechanism begins with the identification of an accurate “skeletal” mechanism. The “skeletal” mechanism is a subset of the detailed mechanism, and is generated by eliminating un-important species and reactions from the detailed mechanism for the problem at hand. Further reduction of the skeletal mechanism is also possible. This can be achieved by a variety of time-scale analysis methods which are applied to the skeletal mechanism such as Quasi-Steady-State Assumption (QSSA), Computational Singular Perturbation (CSP) (Lam and Goussis, 1988), Intrinsic Low Dimensional Manifolds (ILDM) (Mass and Pope., 1992) etc. Time-scale methods are employed for finding species which are approximately in steady-state. Following this, a non-linear system of equations is solved for the steady-state species mixing ratios. As a result, time-scale analysis methods are most efficient when applied to relatively small skeletal mechanisms rather than the full detailed mechanism. Such an approach, using CSP, was used by Neophytou et al. (2004) in order to construct a reduced mechanism for the Carbon Bond mechanism (CBMIV) (Gerry et al., 1989). In this study, our interest is in generating skeletal mechanisms which is the first step in the reduction process, and which can be used as a starting point for further reduction, and be applied to more comprehensive chemistry codes.

Sensitivity Analysis (SA) is perhaps the oldest and most straightforward of methods for identifying skeletal mechanisms (Turanyi et al., 1989). In SA, suitable sensitivity coefficients are defined which are usually reaction-based. The sensitivity of a species with each reaction is calculated for a particular configuration (reaction mode), and reactions having sensitivity coefficients below a threshold value are identified as redundant, and are removed from the detailed mechanism. Such an approach was employed by Heard et al. (1998) for reducing the CBM-EX tropospheric chemical mechanism. The SA resulted in eliminating a number of reactions from the detailed mechanism, and following this steady-state assumptions were further introduced to derive a reduced and computationally faster mechanism. An SA-assisted tabulation method was also used by Dunker (1986) for accelerating the species integration. SA was also employed by Whitehouse et al. (2004) as a first reduction step for generating a skeletal mechanism from the Master Chemical Mechanism (MCM) (Derwent et al., 1998). Reaction-based approaches such as sensitivity analysis and Principal Component Analysis (PCA) (Turanyi et al., 1989), result in removing reactions from the detailed mechanism, but may not always significantly reduce the number of species which is the key factor controlling compute time in numerical simulations. To this end, a number of other techniques have been developed which are species-oriented rather than reaction-oriented. Species lumping is a popular approach: a number of reacting species are

combined into surrogate species whose net effect on the system evolution remains approximately the same. Lumping has been used in the development of the Regional Acid Deposition Model (RADM2) (Stockwell et al., 1990), in the development of SAPRC (Carter, 2000), and for condensing the MCM (Whitehouse et al., 2004). Jenkin et al. (2008) have also used lumping for developing the Common Representatives Intermediates (CRI) mechanism from the MCM. Direct Relation Graph (DRG), is an alternative and efficient species-based method for the generation of skeletal mechanisms, originally proposed by Lu and Law (2005). In DRG, a suitable species Direct Interaction Coefficient (DIC) is defined. The DIC measures the importance a particular species has on a pre-defined set of target species. DRG eventually results in removing species, in contrast with classic reaction-based SA. In the original version of the DRG method, the target species set includes only species appearing in the same reaction as the target species. However, species not interacting directly with the target species through a reaction, may still be important indirectly for a target species of interest. An extension of the DRG method, namely DRG with Error Propagation (DRGEP) was therefore proposed to address this issue (Pepiot-Desjardins and Pitsch, 2008; Niemeyer and Sung, 2011). In DRGEP, the DIC is defined so that the effect of the reaction path is also taken into account during the reduction process. DRGEP has been extensively used to generate skeletal mechanisms for combustion applications, with overall good results, and many variants of the method have henceforth been developed using different DIC definitions and search-finding algorithms (Niemeyer et al., 2010; Stagni et al., 2016; Chen and Chen, 2016). DRGEP has been successfully used by Xia et al. (2009), in combination with a number of other methods, to reduce the  $\alpha$ -pinene oxidation subset of the MCM.

In comparison to SA, and lumping methods, DRGEP has seen limited use for reducing complex atmospheric chemical mechanisms, despite its large potential. In addition, the majority of studies in the literature (which used SA) focused on generating sub-sets of very detailed chemical mechanisms such as the MCM. As a result, the skeletal mechanisms generated from MCM are still of a prohibitive size also for efficient forecasting purposes (Whitehouse et al., 2004). Our focus in this study instead, is on chemical mechanisms which are commonly used in atmospheric models. These mechanisms are already condensed mechanisms, which were typically developed from a bottom-up approach, and include a large number of surrogate/lumped species. It is thus instructive to investigate whether DRGEP can be used for further reduction of these already condensed mechanisms, as a first step in the reduction process.

Another important point to note is that the majority of studies in the literature have only focused on a priori evaluation of the skeletal chemical mechanisms: their performance was evaluated against the model scenario results only, which usually involved 0-D box-model simulations. In a practical air-quality forecast simulation however, advection, diffusion, but also the more refined calculation of photolysis rates, all affect the spatio-temporal concentration of the species. These effects, among others, lead to different mixing ratios from regions having NO<sub>x</sub>-limited to regions having NO<sub>x</sub>-saturated conditions. This affects the species production/destruction rates, and in turn the reduction process, and to date, at least to the knowledge of the authors, no a posteriori validation has been conducted using actual forecasting simulations.

In this study, DRGEP is employed in order to examine whether sufficiently accurate skeletal mechanisms can be generated for a detailed mechanism which is commonly used in forecasting codes, namely the Regional Atmospheric Chemistry Mechanism (RACM). This is an updated version of the Regional Acid Deposition Model (RADM2) mechanism by Stockwell et al. (1997a), and describes the degradation of a number of VOCs. It is a condensed chemical mechanism but it is relatively large,



including 75 species and 237 reactions, and is therefore a good candidate for reduction using DRGEP. **The focus in particular, is in developing skeletal chemistry for application to ground-level ozone prediction in relatively polluted areas.**

In the text which follows, section 2 introduces the DRGEP method, and section 3 lists the process for generating the skeletal mechanism as well as the a priori validation. Details of the a posteriori validation using a popular weather-research and forecasting code are given in section 4.

## 2 Mathematical background: DRGEP

Direct Relation Graph (DRG) is a method for generating subsets of detailed chemical mechanisms by removing species having a negligible effect on a pre-defined set of target species. In the original version of the DRG method developed by Lu and Law (2005), the DIC  $r_{TB}$  between a target species  $T$  and a non-target species  $B$  is defined as,

$$r_{TB} = \frac{\sum_{i=1}^{N_r} |\dot{w}_{iT} \delta_{iB}|}{\sum_{i=1}^{N_r} |\dot{w}_{iT}|} \quad (1)$$

where  $\dot{w}_{iT}$  is the net rate of species  $T$  from reaction  $i$ , and  $\delta_{iB}$  is an index specifying the existence of  $B$  in reaction  $i$ . **The net rate of a species from a general reversible reaction is calculated using  $\dot{w}_{iT} = \nu_{iT} \cdot \dot{w}_i^r$ , where  $\nu_{iT}$  is the difference in stoichiometric coefficients of species  $T$  in reaction  $i$ , and  $\dot{w}_i^r$  is the net rate of reaction  $i$ .** The index  $\delta_{iB}$  is equal to 1 if  $B$  exists in reaction  $i$ , and 0 otherwise. Clearly,  $0 \leq r_{TB} \leq 1$ , and  $r_{TB}$  is generally not equal to  $r_{BT}$ . A large value of  $r_{TB}$  implies that species  $B$  is important in the evaluation of the rate of  $T$ , while a low value implies it is not as important. A threshold  $\epsilon$  is introduced, and provided  $r_{TB} > \epsilon$ , species  $B$  is added to the set of dependent species of  $T$ , otherwise it is deemed un-important and removed. This relation is denoted as a **direct** path  $T \rightarrow B$ . An example of a DRG involving four species A,B,C and D, is given in Fig. 1 with the numbers indicating the values of the DICs for each pair. The process is repeated for all target species  $T_i$ , and the final set of species in the skeletal mechanism is constructed from the union of all target species sets. Species not included in the union set are eliminated, as are reactions involving any of the eliminated species.

DRG has been applied with overall good results in a number of studies in combustion research, yet the simple definition of interaction coefficient in Eq. 1 has some important limitations. Consider the model situation depicted in Fig. 1. If A is the target species and C is the species in question, then with a threshold value  $\epsilon$  of say 0.1, C will be added to the dependent set of A. However, it is clear that there exist "stronger" **i.e. more important** paths from A to C, for example  $A \rightarrow B \rightarrow C$ . Thus, the notion of "path" becomes important, and a suitable DIC definition is required able to describe this. In addition, there are also alternative paths e.g.  $A \rightarrow D \rightarrow C$ , or  $A \rightarrow D \rightarrow B \rightarrow C$ .

The DRGEP method aims to account for the above points by using an improved DIC definition and reduction strategy. In DRGEP (Pepiot-Desjardins and Pitsch, 2008; Niemeyer and Sung, 2011), the DIC is first defined using,

$$r_{TB} = \frac{|\sum_{i=1}^{N_r} \dot{w}_{iT} \delta_{iB}|}{\max(P_T, C_T)} \quad (2)$$

where the production  $P_T$  and consumption terms  $C_T$  of  $T$ , are defined as,

$$P_T = \sum_{i=1}^{N_r} \max(0, \dot{w}_{iT}) \quad (3)$$

$$C_T = \sum_{i=1}^{N_r} \max(0, -\dot{w}_{iT}) \quad (4)$$

The DIC as defined above is calculated for all species. The Path Interaction Coefficient (PIC)  $r_{TB}^p$  for a given path  $p$  connecting target species  $T$  and  $B$  is then defined as,

$$r_{TB}^p = \prod_{i=1}^{n-1} r_{S_i S_{i+1}}|_p \quad (5)$$

i.e. is the product of all DICs along that path. The PIC is calculated for all possible paths connecting  $T$  to  $B$ , and an Overall Path Interaction Coefficient (OIC),  $r_{TB}^o$  is then calculated using,

$$r_{TB}^o = \max \left( \prod_{i=1}^{n-1} r_{S_i S_{i+1}}|_p \right) = \max(r_{TB}^p) \quad (6)$$

i.e. the strongest path from  $T$  to  $B$  is identified based on the product of DICs of connected nodes across all paths linking  $T$  and  $B$ . In the example of Fig. 1, the strongest path is  $A \rightarrow B \rightarrow C$  since for this path  $r_{AC}^o = 0.9 \cdot 0.7 = 0.63$  which is the largest value, and both B and C will be included in the set of A. The process is repeated for all target species of interest, and species with overall interaction coefficients less than a pre-defined threshold value are removed.

The identification of the strongest path is a common problem in computational science, and a number of different search-finding algorithms have been developed for this task. In this study, we employ a classic algorithm for searching through the connected nodes and obtaining  $r_{TB}^o$  and hence the "strongest" path (Dijkstra, 1959). An in-house code, namely REDCHEM\_v0.0 was specifically developed for the DRGEP method, and for all associated functions including the search-finding subroutines.

### 3 Skeletal mechanism development

Reduction methods require input data, and these data should be representative of the actual reaction scenario. This translates to using actual weather-forecast simulation data as input to the DRGEP method. However, this is hardly ever done in practice since there is a large computational overload for conducting such simulations in the first place. As a result, a computationally more efficient initial-value problem (box-model) is used as a model scenario for the reduction, which is common practice in

chemical mechanism reduction studies (Dunker, 1986; Heard et al., 1998; Neophytou et al., 2004). The species mixing ratios  $C_i$  evolve according to,

$$\frac{dC_i}{dt} = G_i(C_k) \quad (7)$$

where  $G_i$  are non-linear functions of the species rates, with initial conditions  $C_i^0$  for the species mixing ratios, and  $T^0$  for temperature. The pressure is kept fixed at 1.0 atm, and the temperature at 298.0 K. The Kinetic Pre-Processor library (KPP) (Damian et al., 2002; Sandu et al., 2003; Daescu et al., 2003) is used for the numerical integration of Eq. 7. The KPP library includes a number of different solvers, and in this study a 5-stage Runge-Kutta method (Hairer et al., 1993; Hairer and Wanner, 1993) is used from the package (Radau5). This method is stiffly accurate and robust, and is often used for benchmarking purposes.

Six different initial scenarios are considered. The species mixing ratios for each model scenario are given in Table 1. These model scenarios were used by Heard et al. (1998) for reducing the CBMEX mechanism using sensitivity analysis. In this work, the same mixing ratios are used as per Table 1 of Heard et al. (1998), but are adapted here for the chemical mechanism used in this study. Here we group important alkane, alkene, and aromatic species for each mechanism, and initialise their mixing ratios based on the relevant alkane, alkene and aromatic species found in the study of Heard et al. (1998). Cases A-C correspond to increasing VOC/NO<sub>x</sub> ratios not including isoprene, while cases D-F correspond to about the same VOC/NO<sub>x</sub> ratios with isoprene included. The VOC/NO<sub>x</sub> ratios are relatively high, and this ensures that a large number of VOC-relevant reactions are activated-in this process a relatively large region of the composition space is thus covered. **At the same time we are interested in ozone production in relatively highly-polluted areas where such conditions are typically found.**

The  $J$  values for the photolysis rate coefficients are based on parameterisations as developed in the MCM (Derwent et al., 1998). These are given by,

$$J = I \cos^M(\theta) e^{-N \sec(\theta)} \quad (8)$$

where  $\theta$  is the solar azimuth angle, and  $I$ ,  $M$  and  $N$  are reaction-specific constants. A 48-hour run is conducted for each scenario, which results in a total of 496 datasets. These scenarios are used as input for DRGEP and the reduction process is done on a dataset-basis. Important species are retained for each dataset, and the process is repeated for the next dataset. Any new species not already included in the dataset is added. Once all datasets are considered, a species union set is formed, and any reactions involving species other than those included in the species union set are removed. The target species is set to be O<sub>3</sub> which is an important pollutant of interest. In addition, O<sub>3</sub> is eventually produced by the degradation of the VOCs through a large number of reaction pathways, and is therefore a good target for the reduction.

As an example, Table 2 lists the OIC values for target O<sub>3</sub> as obtained for scenario A at midday (t=12 hours) and midnight (t=24 hours). Clearly, there is a difference in the OIC values for each species since the rate constants depend on the solar azimuth angle which determines the rate constants of the photolytic reactions. Top-scoring species for O<sub>3</sub> include third-body species

M, and oxygen species such as O3P (ground-state oxygen atom) and O1D (excited state oxygen atom). This is expected since these species readily react to produce O<sub>3</sub> through the reactions O3P + M => O<sub>3</sub> and O1D + M => O<sub>3</sub>. Nitrogen oxides NO and NO<sub>2</sub> also score high as they too react both directly and indirectly with ozone. Direct paths include the reactions O<sub>3</sub> + NO => NO<sub>2</sub> + O<sub>2</sub>, and O<sub>3</sub> + NO<sub>2</sub> => NO<sub>3</sub> + O<sub>2</sub> while indirect paths include reactions with O3P. The methyl-peroxy radical MO<sub>2</sub> also ranks high since it is involved in numerous reactions with VOCs. The hydroxyl radical HO also scores high since it is the main oxidation path of the VOCs which eventually end up producing ozone. With a threshold of 9.0E-3 (which results in a 54-species subset as explained later on), 18 species will be included in the set for t=12 hours, and 11 species will be included for t=24 hours, and the process is repeated for all other data sets to form the overall species union set for the target O<sub>3</sub>.

10 In order to quantify the quality of the skeletal mechanisms generated using DRGEP, a percentage error is defined based on the target species of interest i.e. ozone. For a mixing ratio obtained using the skeletal mechanism  $C_i^s$ , and a mixing ratio using the detailed mechanism  $C_i^d$ , this is defined as,

$$e = \frac{1}{N} \sum_{i=1}^N \frac{1}{T} \int 100 \cdot \frac{|C_i^s(t) - C_i^d(t)|}{|C_i^d(t)|} dt \quad (9)$$

where  $N$  is the total number of cases. Note that zero values are not taken into account for the error calculation.

15 Figure 2 shows this error against the number of species in the skeletal mechanism. As expected, the error increases as more species are removed. With about 10 species removed (75 to 65) the error is negligibly small. This error increases once more than about 10 species are removed, however the error remains small down to about 55 species (20 species removed) at less than 10%. The huge spike in the error below about 55 species, results from the removal of important intermediates.

Figure 3 shows the percentage in speedup (cpu-time) gained, against the number of species in the skeletal mechanisms. This is done for case A, and similar results were observed for the rest of the cases. The speedup is calculated both for the total simulation time, and for integrating Eq. 3 alone. The threshold line where the error in O<sub>3</sub> prediction spikes as per the results in Fig. 2 is also shown. Clearly, as the number of species is reduced, **the computational** time drops and there is an increase for both speedups. It is interesting to note that going from 64 to 58 species there is no increase in integration speedup. This implies that the stiffness of the remaining species and equations is unchanged. Nevertheless, there is an increase in total speedup of almost 10% going from 64 to 58 species, and this is only due to simulation overheads alone which is quite significant. The average speedup due to overhead computations is found to be 6.6%. At the threshold error  $e$  of 10%, the smallest possible skeletal mechanism contains 54 species and 150 reactions (threshold for OIC at this point is 9.0E0-3), which is significantly smaller than the detailed mechanism.

For this mechanism, the total speedups and integration speedups are 54.4% and 43.7% respectively. In general, the CPU time scales with the total number of species in the system due to the evaluation of the Jacobian when dealing with stiff systems. For integration of the system alone, the expected speedup percentage scales as  $\text{speedup} (\%) = 100 \cdot |(N_{sp}/N_{sp,det})^2 - 1|$ , and this is shown as a blue line in Fig. 3. Clearly, there is a good qualitative agreement with the theoretical result.

In order to visualise the errors in ozone mixing ratio more clearly, Fig. 4 shows the solution profiles for scenarios A-C for the 48-hour simulations, using the detailed and worst-performing skeletal mechanism (having 54 species). It is clear that the agreement with the detailed mechanism is very good for all six scenarios. In the isoprene scenarios D-F, similarly good results were obtained and are not presented here. It is also important to note that the agreement is particularly good both at early times and at longer times for the box-model problem. In a forecasting simulation, the situation is somewhat different. Typical time-steps used in forecasting simulations are of the order of minutes, and a new initial-value problem is solved at every time-step for the species mixing ratios, using the previous time-step mixing ratios as the new initial condition. Furthermore, an operator splitting approach is used in the majority of codes for integrating the species mixing ratios, and this process is equivalent to filtering/smoothing the mixing ratio fields, which reduces the stiffness of the system. From this point of view, integration in forecasting codes is less stringent than integration in box-model runs. In this sense, the skeletal mechanism need only be accurate enough over the integration time-step only, before the next initial-value problem is solved.

It is also important to note that the skeletal mechanism was developed with relatively polluted conditions in mind, for predicting ozone, hence the relatively large VOC/NO<sub>x</sub> ratios used for the reduction in Table 1. The method however is general and can be tailored for modelling conditions of specific interest e.g. low VOC/NO<sub>x</sub> conditions. In order to examine the performance of the smallest skeletal mechanism for such conditions, additional box-model runs were conducted for significantly lower VOC/NO<sub>x</sub> ratios. In particular, the NO and NO<sub>2</sub> mixing ratios in Table 1 were increased by a factor of six for each species, leading to initial conditions having VOC/NO<sub>x</sub> ratios of 0.7, 1.8 and 3.2 for modified scenarios A'-C' respectively. The results are shown in Fig. 5 for the worst-performing skeletal mechanism (having 54 species). The agreement with the detailed chemical mechanism is particularly good for all three cases both at early times and for longer times. Even though the chemistry for low VOC/NO<sub>x</sub> conditions is somewhat different, the results in Fig. 5 indicate that the reduction process is not as sensitive to the VOC/NO<sub>x</sub> ratio-the most important parameter instead was found to be variation in sun-light intensity due to the activation/de-activation of photo-sensitive reactions.

## 4 A posteriori validation

The results of the previous section constitute an a priori validation. In an actual simulation, the photolysis rates but also the species mixing ratios due to the effects of advection, diffusion and so on, can be substantially different from the conditions in a box-model. As a result, the species rates will also differ which affects the reduction process. The aim of this section is to examine the performance of the skeletal mechanism generated in the previous section, by implementing it in an actual atmospheric-chemistry simulation, and comparing with results using the detailed chemical mechanism.

### 4.1 WRF-Chem simulation setup

The Weather Research and Forecasting system with Chemistry (WRF-Chem/version 3.9.1.1) has been employed in this work. WRF-Chem, which has been developed jointly between several research institutes (<https://www2.acd.ucar.edu/wrf-chem>), is a state-of-the art, open source, limited-area atmospheric model, featuring a highly parallelised code. WRF-Chem is used both

for research applications and for operational numerical weather and air-quality predictions, and is an online, fully coupled model, which integrates and calculates meteorology, gas-phase chemistry and aerosols simultaneously (Grell et al., 2005). WRF-Chem utilizes the Advanced Research WRF (ARW) solver (Skamarock et al., 2005), where the transformation, mixing-phase, and transport of chemical species and aerosols, are calculated following the same prognostic equations, time-step, and  
5 spatial configuration with the meteorology, physics and other transport constituents of the ARW dynamical core.

In this study, the model is configured over a single domain using the LatLon geographical projection, with about  $0.15^\circ$  ( $\sim 16$  km) horizontal grid spacing, and a domain of 165 (E–W) by 165 (N–S) grid points as shown in Fig. 6. Thirty vertical model levels were used, which correspond to a maximum height of about 20 km ( $\sim 50$  hPa). Owing to its modular design, WRF-Chem provides several choices of chemical mechanisms and physics parameterisations. In this study, RACM is used for  
10 the gas-phase chemistry (Stockwell et al., 1997b; Geiger et al., 2003), and KPP for the integration of the species mixing ratios. The full RACM mechanism as implemented in WRF-Chem includes 75 species and 237 reactions. Table 3 summarizes the major model features and physical parameterizations as used in the simulations.

The meteorological fields were forced by initial and lateral boundary conditions obtained from the National Centers for the Environmental Prediction/Global Forecast System (NCEP/GFS) at a spatial resolution of  $0.25^\circ$ , and updated at a three-hour  
15 interval. MODIS-based geo-terrestrial data, including land categories, soil types, and terrain height, have been used. Our aim, as a first step, is to examine ozone mixing ratio predictions between the detailed mechanism and the skeletal mechanism using DRGEP, without the influence of any external source terms. Emissions' modelling is a challenge on its own, and emissions inventories contain many uncertainties. Furthermore, these inventories always have inter-dependencies with the resolution of the mesh, the time-step used, the chemical mechanism used, speciation profiling etc. This introduces uncertainties in evaluating  
20 the performance of the skeletal mechanism-including emissions would hinder the process of determining whether any errors are a result of the reduction process or a result of uncertainties in the emissions inventories. Excluding emissions (at this stage) will thus give a clearer picture as to the effect of transport terms only on the spatio-temporal distribution of ozone. In order to do that, neither anthropogenic/biogenic emissions have been utilised, nor any chemical initial and boundary conditions have been applied to the chemistry fields. For the latter, the model uses instead, idealized climatologically based values to initialise  
25 the chemical species. Further details of the initialisation are given in the WRF-Chem user guide (WRF-Chem, 2017).

For the purposes of this study, two separate simulations were conducted for the period of 12 to 28 July, 2017, a time of year during which ozone photochemistry is particularly active in this region. The first five days of the model output are considered as model spin-up time, and have been excluded from our analysis. The model instantaneous, grid-cell averaged mixing ratios, were set to be written out (at the beginning of) every hour. The first simulation, used the complete (unmodified)  
30 RACM mechanism as implemented in the WRF-Chem package, while the second simulation utilised the skeletal (via DRGEP algorithm) mechanism. For a fair comparison between the two simulations, both setups shared the same namelist, which is included in the Supplement.

The implementation of a new chemical mechanism in WRF-Chem is a rather tedious process. This includes creating new reaction and species files, compiling KPP with the new mechanism, but also writing new mechanism-specific driver routines, and initialisation routines. A work-around, is to instead modify the existing chemical mechanism file (in this case RACM), so  
35

that it accounts for the reduced chemistry. This simple method implies that neither driver routines need to be re-written nor calls to subroutines need to change to account for the reduction in species etc. This is achieved by setting dummy reactions for all species which are removed in the skeletal mechanism. The corresponding KPP reactions in the skeletal mechanism, are included in the Supplement. From a computational perspective, the skeletal mechanism was found to be more efficient than the  
5 detailed mechanism, as expected: on 40 MPI processes, the wall-clock times using the detailed and skeletal mechanisms were 959 minutes and 730 minutes respectively. This translates to an overall gain in CPU time of 24.6%.

This speedup is of the same order of magnitude as in the box-model runs. However due to the implementation of the skeletal mechanism in WRF-Chem (all species kept), this speedup does not include over-heads. In case a new mechanism is written (with fewer number of species), and all relevant subroutine calls are suitably modified in order to include only the species in the  
10 skeletal mechanism, an even further gain in speedup is expected from simulation overheads (input/output, calls to subroutines etc.).

## 4.2 Comparison of mixing ratios

In order to warrant a more quantitative evaluation of the performance of the skeletal mechanism, we additionally calculate the volume-averaged error (based on ozone mixing ratio), in time, between the skeletal and detailed mechanisms. This is defined  
15 as,

$$e'(t) = \frac{1}{V} \int_{\mathbf{x}} 100 \cdot \frac{|C^s(\mathbf{x}, t) - C^d(\mathbf{x}, t)|}{|C^d(\mathbf{x}, t)|} d\mathbf{x} \quad (10)$$

where  $V$  is the sample-space volume and  $C^d$ ,  $C^s$ , are the predictions of scalar field  $C$  using the detailed and skeletal mechanisms respectively. The sample volume  $V$  is taken to include all points in the longitudinal and latitudinal directions. **In the vertical direction two different cases are considered, the lower troposphere spanning vertical levels 1-9 and the upper troposphere spanning vertical levels 10-22. The lower troposphere covers a significant part including the planetary boundary layer. The upper troposphere corresponds to altitudes of 2-13 km at mid-latitudes. For this range, there are substantial differences in pressure, temperature and species mixing ratios. Even though regional models are not tuned for the upper troposphere, it is still instructive to examine how the skeletal mechanism performs in this region.** Mixing ratios having zero values are not considered for the error calculation.  
20

## 25 4.3 Lower troposphere

Figure 7 shows a direct comparison between the ozone mixing ratios as predicted using the full mechanism (left) and the skeletal mechanism (right). The **instance** depicted, corresponds to the case of maximum error  $e'(t)$ . From a visual inspection alone, it is clear that there is very good agreement for the spatial ozone concentration prediction using the skeletal mechanism.

The corresponding error for the ozone mixing ratio field is depicted on the left plot of Fig. 8. Over the 265 time steps (hours)  
30 included in the analysis, it is found that  $e'$  varies between 2.52% and 4.21%. These small errors confirm the good agreement

observed for the instantaneous ozone predictions shown in Fig. 7. The right plot of Fig. 8 shows the distribution of error, averaged in the vertical layers only, for the time instance of maximum  $e'$  i.e. at 100 hours. This helps to elucidate the actual spatial distribution of the error in terms of latitude and longitude. The error distribution is also within reasonable bounds at this instance, not exceeding 10 %. Note, that this distribution applies at the instance of maximum volume-averaged error as calculated using Eq. 10. This error is actually transported during the simulation i.e. is not specific to a particular region.

Figures 9, 10 and 11, 12 show the corresponding results for carbon monoxide which is a slow-reacting species, and formaldehyde which is a relatively faster-reacting species. Both these species were not included as targets during the reduction, therefore it is instructive to examine how their mixing ratio predictions compare to ozone which was the target species. Figures 9 and 10 show that the CO predictions are also in good agreement with relatively small percentage errors. The maximum volume-weighted error  $e'$  for carbon monoxide during the simulation does not exceed 2.6 %. The instantaneous error averaged in the vertical layers only at the time of maximum  $e'$  also remains low as one may observe from the right plot of Fig. 10. The errors for formaldehyde on the other hand are relatively larger as one may observe from the results in Figs. 11 and 12. The maximum volume-weighted error is about 7% while the instantaneous error for the time of maximum  $e'$  is in the region of 20% as one may observe from the right plot of Fig. 12. Formaldehyde, which is an important intermediate species (Lelieveld et al., 2016), is involved in many oxidation reactions including a number of VOCs hence the relatively larger errors. The same applies for the hydroxyl radical HO, whose errors were also found to be relatively large. In particular, for the subset mechanism including 54 species, higher alkanes such as HC3 but also TOL (Toluene) were identified as redundant species from the DRGEP. These species constitute an important HO consumption pathway, and excluding them leads to an over-estimation of the HO mixing ratio. Much better results may be obtained by either reducing the OIC threshold (hence including more species) or by including more targets during the reduction. Both these approaches however, will lead to larger skeletal mechanisms and a reduction in speedup, in other words, careful selection of the targets is required to obtain both an accurate but also computationally fast mechanism.

#### 4.4 Upper troposphere

Percentage errors as defined above, are calculated for O<sub>3</sub>, CO, and HCHO for levels 10-22. The results are shown in Figs. 13-18 respectively. Ozone concentration predictions using the skeletal mechanism are particularly good. The maximum instantaneous error is about 1.22 % which is lower than the corresponding error observed for the lower troposphere in Fig. 8. The error is also found to be lower for CO. The error for formaldehyde which is a relatively faster species is larger in comparison. Furthermore, this error is also larger than the corresponding error observed in the lower troposphere. Overall, however ozone which was the target species is predicted accurately despite the different thermo-chemical conditions found at larger altitudes.

It is also important to note at this point that care should be taken when using skeletal mechanisms in regional/climate simulations. Mechanisms such as RACM have traditionally been developed with a particular application area in mind, and validated usually against smog-chamber data over a limited set of conditions only. Starting from a detailed chemical mechanism, several subset skeletal mechanisms can in principle be derived for particular applications of interest. Thus far this process was not usually done in a formal way-developers added, subtracted or lumped species based mostly on experience, so as to match sim-



ulation results against experimental results. As indicated by Kaduwela et al. (2015), the development of atmospheric chemical mechanisms should follow a more formal process, by assimilating information on chemical kinetics, compiling detailed mechanisms, evaluating their performance, and finally reducing for applications of interest through a formal procedure. DRGEP is one such formal reduction process which can be employed for developing skeletal mechanisms from explicit detailed mechanisms for target species/conditions of interest, other than the ones considered in this study.

## 5 Conclusions

A Direct Relation Graph approach for generating skeletal chemical mechanisms from more detailed mechanisms has been employed, in order to produce a computationally more efficient mechanism for accelerated atmospheric chemistry simulations. A code has been developed for the task, and the method has been applied to a commonly used mechanism, namely RACM, with the target species being ozone which is a major pollutant.

The skeletal mechanism was developed using input from a 0-D initial-value problem, and was validated both a priori against the 0-D problem results, but also a posteriori. The a posteriori validation involved implementing both the detailed and the skeletal mechanisms in an actual **air-quality** forecasting code, namely WRF-Chem, and running simulations to compare the spatio-temporal ozone mixing ratio profiles. The skeletal mechanism is found to perform well, with relatively low percentage errors. A speedup of 24.6% was achieved for the total simulation time, which does not yet include any speedup due to overheads such as input-output computations.

The method is general, and can be applied to any chemical mechanism in the WRF-Chem package or other chemistry-transport codes, for producing computationally more efficient air quality and climate simulations. Since a significant speedup has been achieved with the already optimized chemical mechanism used in this study, it is expected that future application to more comprehensive chemistry mechanisms may lead to significant gains in computational efficiency.

*Competing interests.* The authors declare that they have no conflict of interest.

*Acknowledgements.* ZMN acknowledges funding through the VI-SEEM project which receives funding from the European Union's H2020 research and innovation program under grant agreement no. 675121.

*Code and data availability.* The WRF-Chem package used for the numerical simulations is available from the National Center for Atmospheric Research (NCAR): <https://www2.aocom.ucar.edu/wrf-chem>. The WRF-Chem namelist file, and the skeletal RACM mechanism are given as supplements. The code used for the DRGEP can be obtained from the authors upon request.

## References

- Carter, W.: Development and evaluation of the saprc-99 chemical mechanism, Air Pollution Research Center and College of Engineering Center for Environmental Research and Technology, University of California, Riverside, CA, USA., <http://www.cert.ucr.edu/~carter/SAPRC/>, 2000.
- 5 Chen, Y. and Chen, J.: Application of Jacobian defined direct interaction coefficient in DRGEP-based chemical mechanism reduction methods using different graph search algorithms, *Combust. Flame*, 174, 77–84, 2016.
- Christou, M., Christoudias, T., Morillo, J., Alvarez, J., and Merx, H.: Earth system modelling on system-level heterogeneous architectures: EMAC (version 2.42) on the Dynamical Exascale Entry Platform (DEEP), *Geos. Model Dev.*, 9, 3483–3491, 2016.
- Daescu, D., Sandu, A., and Carmichael, G.: Direct and Adjoint Sensitivity Analysis of Chemical Kinetic Systems with KPP: II – Validation and Numerical Experiments, *Atmos. Env.*, 37, 5097–5114, 2003.
- 10 Damian, V., Sandu, A., Damian, M., Potra, F., and Carmichael, G.: The Kinetic PreProcessor KPP–A Software Environment for Solving Chemical Kinetics, *Comput. and Chem. Eng.*, 26, 1567–1579, 2002.
- Derwent, R., Jenkin, M., Saunders, S., and Pilling, M.: Photochemical ozone creation potentials for organic compounds in northwest Europe calculated with a master chemical mechanism, *Atmos. Env.*, 32, 2429–2441, 1998.
- 15 Dijkstra, E.: A note on two problems in connexion with graphs, *Numer. Math.*, 1, 261–271, 1959.
- Dunker, A.: The reduction and parameterisation of chemical mechanisms for inclusion in atmospheric reaction-transport models, *Atmos. Env.*, 20, 479–486, 1986.
- Geiger, H., Barnes, I., Bejan, I., Benter, T., and Spittler, M.: The tropospheric degradation of isoprene: an updated module for the regional atmospheric chemistry mechanism, *Atmospheric Environment*, 37, 1503–1519, 2003.
- 20 Gerry, M., Whitten, G., Killus, J., and Dodge, M.: A photochemical kinetics mechanism for urban and regional scale computer modelling, *J. Geoph. Res.*, 94, 12 925–12 956, 1989.
- Grell, G. A. and Dévényi, D.: A generalized approach to parameterizing convection combining ensemble and data assimilation techniques, *Geophysical Research Letters*, 29, 2002.
- Grell, G. A., Peckham, S. E., Schmitz, R., McKeen, S. A., Frost, G., Skamarock, W. C., and Eder, B.: Fully coupled “online” chemistry within the WRF model, *Atmospheric Environment*, 39, 6957–6975, 2005.
- 25 Hairer, E. and Wanner, G.: *Solving Ordinary Differential Equations II. Stiff and Differential-Algebraic Problems*, Springer-Verlag, Berlin, 1993.
- Hairer, E., Norsett, S., and Wanner, G.: *Solving Ordinary Differential Equations I. Nonstiff Problems*, Springer-Verlag, Berlin, 1993.
- Heard, A., Pilling, M., and Tomlin, A.: Mechanism reduction techniques applied to tropospheric chemistry, *Atmos. Env.*, 32, 1059–1073, 30 1998.
- Hong, S.-Y., Dudhia, J., and Chen, S.-H.: A revised approach to ice microphysical processes for the bulk parameterization of clouds and precipitation, *Monthly Weather Review*, 132, 103–120, 2004.
- Hong, S.-Y., Noh, Y., and Dudhia, J.: A new vertical diffusion package with an explicit treatment of entrainment processes, *Monthly weather review*, 134, 2318–2341, 2006.
- 35 Iacono, M. J., Delamere, J. S., Mlawer, E. J., Shephard, M. W., Clough, S. A., and Collins, W. D.: Radiative forcing by long-lived greenhouse gases: Calculations with the AER radiative transfer models, *Journal of Geophysical Research: Atmospheres*, 113, 2008.

- Jenkin, M., Watson, L., Utembe, S., and Shallcross, D.: A Common Representative Intermediates (CRI) mechanism for VOC degradation. Part 1: Gas phase mechanism development, *Atmos. Env.*, 42, 7185–7195, 2008.
- Kaduwela, A., Luecken, D., Carter, W., and Derwent, R.: New directions: Atmospheric chemical mechanisms for the future, *Atmos. Env.*, 122, 609–610, 2015.
- 5 Lam, S. and Goussis, D.: Understanding Complex Chemical Kinetics with Computational Singular Perturbation, 22nd Symp. Int. Combust., pp. 931–941, 1988.
- Lelieveld, J., Gromov, S., Pozzer, A., and Taraborelli, D.: Global tropospheric hydroxyl distribution, budget and reactivity, *Atmos. Chem. Phys.*, 16, 12 477–12 493, 2016.
- Lu, T. and Law, C.: A directed relation graph method for mechanism reduction, *Proc. Combust. Inst.*, 30, 1333–1341, 2005.
- 10 Mass, U. and Pope, S.: Simplifying Chemical Kinetics: Intrinsic Low-Dimensional Manifolds in Composition Space, *Combust. Flame*, 88, 239–264, 1992.
- Neophytou, M., Goussis, D., van Loon, M., and Mastorakos, E.: Reduced chemical mechanisms for atmospheric pollution using Computational Singular Perturbation analysis, *Atmos. Env.*, 38, 3661–3673, 2004.
- Niemeyer, K. and Sung, C.: On the importance of graph search algorithms for DRGEP-based mechanism reduction methods, *Combust. Flame*, 158, 1439–1443, 2011.
- 15 Niemeyer, K., Sung, C., and Raju, M.: Skeletal mechanism generation for surrogate fuels using direct relation graph with error propagation and sensitivity analysis, *Combust. Flame*, 157, 1760–1770, 2010.
- Nikolaou, Z., Chen, J., and Swaminathan, N.: A 5-step reduced mechanism for combustion of CO/H<sub>2</sub>/H<sub>2</sub>O/CH<sub>4</sub>/CO<sub>2</sub> mixtures with low hydrogen/methane and high H<sub>2</sub>O content, *Combust. Flame*, 160, 56–75, 2013.
- 20 Nikolaou, Z., Swaminathan, N., and Chen, J.: Evaluation of a reduced mechanism for turbulent premixed combustion, *Combust. Flame*, 161, 3085–3099, 2014.
- Paulson, C. A.: The mathematical representation of wind speed and temperature profiles in the unstable atmospheric surface layer, *Journal of Applied Meteorology*, 9, 857–861, 1970.
- Pepiot-Desjardins, P. and Pitsch, H.: An efficient error-propagation-based reduction method for large chemical kinetic mechanisms, *Combust. Flame*, 154, 67–81, 2008.
- 25 Peters, N. and Rogg, B.: Reduced Reaction Mechanisms for Applications in Combustion Systems, *Notes in Physics: Springer-Verlag*, 15, 1993.
- Pope, S.: Computationally efficient implementation of combustion chemistry using in situ adaptive tabulation, *Combust. Theory Model.*, 1, 41–63, 1997.
- 30 Sandu, A., Verwer, J., Blom, J., Spee, E., Carmichael, G., and Potra, F.: Benchmarking of stiff ODE solvers for atmospheric chemistry problems II: Rosenbrock solvers, *Atmos. Env.*, 31, 3459–3472, 1997a.
- Sandu, A., Verwer, J., van Loon, M., Carmichael, G., Potra, F., Dabdub, D., and Seinfeld, J.: Benchmarking of stiff ODE solvers for atmospheric chemistry problems I: implicit vs explicit, *Atmos. Env.*, 31, 479–486, 1997b.
- Sandu, A., Daescu, D., and Carmichael, G.: Direct and Adjoint Sensitivity Analysis of Chemical Kinetic Systems with KPP: I–Theory and Software Tools, *Atmos. Env.*, 37, 5083–5096, 2003.
- 35 Skamarock, W. C., Klemp, J. B., Dudhia, J., Gill, D. O., Barker, D. M., Wang, W., and Powers, J. G.: A description of the advanced research WRF version 2, Tech. rep., National Center For Atmospheric Research Boulder Co Mesoscale and Microscale Meteorology Div, 2005.

- Stagni, A., Frassoltadi, A., Cuoci, A., Faravelli, T., and Ranzi, E.: Skeletal mechanism reduction through species-targeted sensitivity analysis, *Combust. Flame*, 163, 382–393, 2016.
- Stockwell, W. R., Middleton, P., Chang, J., and Tang, X.: The second generation regional acid deposition model chemical mechanism for regional air quality modeling, *J. Geoph. Res.*, 95, 16 343–16 367, 1990.
- 5 Stockwell, W. R., Kirchner, F., and Kuhn, M.: A new mechanism for regional atmospheric chemistry modeling, *J. Geoph. Res.*, 102, 25 847–25 879, 1997a.
- Stockwell, W. R., Kirchner, F., Kuhn, M., and Seefeld, S.: A new mechanism for regional atmospheric chemistry modeling, *Journal of Geophysical Research: Atmospheres*, 102, 25 847–25 879, 1997b.
- Tewari, M., Chen, F., Wang, W., Dudhia, J., LeMone, M., Mitchell, K., Ek, M., Gayno, G., Wegiel, J., and Cuenca, R.: Implementation and verification of the unified NOAH land surface model in the WRF model, in: 20th conference on weather analysis and forecasting/16th conference on numerical weather prediction, vol. 1115, 2004.
- 10 Tomlin, A., Turanyi, T., and Pilling, M.: Chapter 4: Mathematical tools for the construction, investigation and reduction of combustion mechanisms, *Compr. Chem. Kinetics*, 35, 293–247, 1997.
- Turanyi, T., Berces, T., and Vajda, S.: Reaction rate analysis of complex kinetic systems, *Int. J. Chem. Kinetics*, 21, 83–99, 1989.
- 15 Webb, E. K.: Profile relationships: The log-linear range, and extension to strong stability, *Quarterly Journal of the Royal Meteorological Society*, 96, 67–90, 1970.
- Whitehouse, L., Tomlin, A., and Pilling, M.: Systematic reduction of complex tropospheric chemical mechanisms, Part II: Lumping using a time-scale based approach, *Atmos. Chem. Phys.*, 4, 2057–2081, 2004.
- Wild, O., Zhu, X., and Prather, M. J.: Fast-J: Accurate simulation of in-and below-cloud photolysis in tropospheric chemical models, *Journal of Atmospheric Chemistry*, 37, 245–282, 2000.
- 20 WRF-Chem: WRF-Chem user manual for version 3.9.1.1, [https://ruc.noaa.gov/wrf/wrf-chem/Users\\_guide.pdf](https://ruc.noaa.gov/wrf/wrf-chem/Users_guide.pdf), 2017.
- Xia, A., Michelangeli, D., and Makar, P.: Mechanism reduction for the formation of secondary organic aerosol for integration into a 3-dimensional regional air quality model: a-pinene oxidation system, *Atmos. Chem. Phys.*, 9, 4341–4362, 2009.

| Species-RACM | A     | B     | C     | D     | E     | F     |
|--------------|-------|-------|-------|-------|-------|-------|
| NO           | 163.0 | 65.1  | 72.1  | 163.0 | 65.1  | 72.1  |
| NO2          | 6.9   | 2.2   | 3.3   | 6.9   | 2.2   | 3.3   |
| HCHO         | 0.9   | 0.9   | 1.7   | 0.9   | 0.9   | 1.7   |
| Alkanes:     |       |       |       |       |       |       |
| ALD          | 4.2   | 4.2   | 8.4   | 4.2   | 4.2   | 8.4   |
| CH4          | 155.0 | 155.0 | 310.0 | 155.0 | 155.0 | 310.0 |
| ETH          | 155.0 | 155.0 | 310.0 | 155.0 | 155.0 | 310.0 |
| HC3          | 155.0 | 155.0 | 310.0 | 155.0 | 155.0 | 310.0 |
| HC5          | 155.0 | 155.0 | 310.0 | 155.0 | 155.0 | 310.0 |
| HC8          | 155.0 | 155.0 | 310.0 | 155.0 | 155.0 | 310.0 |
| Alkenes:     |       |       |       |       |       |       |
| OLT          | 13.0  | 13.0  | 26.0  | 13.0  | 13.0  | 26.0  |
| OLI          | 13.0  | 13.0  | 26.0  | 13.0  | 13.0  | 26.0  |
| DIEN         | 13.0  | 13.0  | 26.0  | 13.0  | 13.0  | 26.0  |
| ETE          | 30.0  | 30.9  | 62.0  | 30.0  | 30.9  | 62.0  |
| ISO          | 0.0   | 0.0   | 0.0   | 28.0  | 28.0  | 55.8  |
| Aromatics:   |       |       |       |       |       |       |
| TOL          | 14.6  | 14.6  | 29.2  | 14.6  | 14.6  | 29.2  |
| XYL          | 10.6  | 10.6  | 21.2  | 10.6  | 10.6  | 21.2  |

**Table 1.** Initial species mixing ratios (ppbv) for RACM as deduced from Heard et al. (1998). Water content is  $10^7$  ppbv, CO content is 2310 ppbv. Pressure is fixed at 1 atm, and temperature at 298 K. VOC/NO<sub>x</sub> ratios (methane not included) for cases A-F: 4.2, 10.7, 19.1, 4.4, 11.1, 19.8.

| Index | Species name | OIC, t=12 hours | Species name | OIC, t=24 hours |
|-------|--------------|-----------------|--------------|-----------------|
| 1     | O3           | 1               | O3           | 1               |
| 2     | M            | 0.99965         | M            | 0.99023         |
| 3     | O3P          | 0.96864         | O3P          | 0.95424         |
| 4     | NO2          | 0.25278         | NO2          | 0.10845         |
| 5     | NO           | 0.24826         | NO           | 0.10544         |
| 6     | O1D          | 4.30E-02        | O1D          | 5.06E-02        |
| 7     | HO2          | 3.94E-02        | HO2          | 2.01E-02        |
| 8     | HO           | 1.83E-02        | MO2          | 1.48E-02        |
| 9     | MO2          | 1.78E-02        | H2O          | 1.32E-02        |
| 10    | ACO3         | 1.51E-02        | HO           | 1.32E-02        |
| 11    | ALD          | 1.41E-02        | ACO3         | 1.10E-02        |
| 12    | HCHO         | 1.29E-02        | HCHO         | 8.71E-03        |
| 13    | ETHP         | 1.27E-02        | CO           | 8.60E-03        |
| 14    | CO           | 1.18E-02        | CO2          | 7.15E-03        |
| 15    | H2O          | 1.15E-02        | ALD          | 7.10E-03        |
| 16    | KET          | 1.13E-02        | ETHP         | 5.41E-03        |
| 17    | NO3          | 1.12E-02        | NO3          | 5.11E-03        |
| 18    | XO2          | 1.06E-02        | KET          | 4.63E-03        |
| 19    | ONIT         | 8.90E-03        | OP1          | 4.11E-03        |
| 20    | CO2          | 6.20E-03        | XO2          | 3.47E-03        |
| 21    | HC8          | 5.35E-03        | OP2          | 2.85E-03        |
| 22    | HKET         | 5.35E-03        | HC3P         | 2.84E-03        |
| 23    | HC8P         | 5.35E-03        | ONIT         | 2.81E-03        |
| 24    | OP2          | 5.00E-03        | HC5          | 1.93E-03        |
| 25    | PAN          | 4.72E-03        | HC5P         | 1.93E-03        |
| 26    | HC5          | 4.56E-03        | GLY          | 1.80E-03        |
| 27    | HC5P         | 4.56E-03        | H2O2         | 1.79E-03        |
| 28    | HC3P         | 3.92E-03        | ORA1         | 1.63E-03        |
| 29    | OP1          | 3.38E-03        | HC3          | 1.63E-03        |
| 30    | ORA1         | 2.32E-03        | HKET         | 1.13E-03        |
| 31    | HC3          | 2.32E-03        | ORA2         | 1.06E-03        |
| 32    | GLY          | 2.32E-03        | HC8          | 1.06E-03        |
| 33    | PHO          | 2.09E-03        | HC8P         | 1.06E-03        |
| 34    | CSL          | 2.09E-03        | KETP         | 1.05E-03        |
| 35    | HNO3         | 2.07E-03        | PAA          | 7.95E-04        |

**Table 2.** Overall Interaction Coefficients (OICs) for target O<sub>3</sub> (top 35) for case A at t=12 and t=24 hours.

| Feature                     | Description                                                                                                                                                  | Details                |
|-----------------------------|--------------------------------------------------------------------------------------------------------------------------------------------------------------|------------------------|
| Horizontal grid resolution  | 0.15° (~16 km)                                                                                                                                               | Geographic LatLon      |
| Number of vertical layers   | 30 terrain following sigma coordinates                                                                                                                       |                        |
| Simulation time step        | 60 s                                                                                                                                                         |                        |
| Land-surface scheme         | Noah land-surface unified model<br>(Tewari et al., 2004)                                                                                                     | sf_surface_physics = 2 |
| Cloud microphysics          | WRF Single-Moment (WSM) 3-class<br>simple ice scheme<br>(Hong et al., 2004)                                                                                  | mp_physics = 3         |
| Surface layer               | Monin-Obukhov similarity theory (MM5)<br>with Carlson-Boland viscous sublayer and<br>similarity functions from look-up tables<br>(Paulson, 1970; Webb, 1970) | sf_sfclay_physics = 1  |
| Shortwave radiation         | Rapid Radiative Transfer Model (RRTMG)<br>(Iacono et al., 2008)                                                                                              | ra_sw_physics = 4      |
| Longwave radiation          | Rapid Radiative Transfer Model (RRTMG)<br>(Iacono et al., 2008)                                                                                              | ra_lw_physics = 4      |
| Planetary boundary layer    | Yonsei University (YSU) PBL<br>(Hong et al., 2006)                                                                                                           | bl_pbl_physics = 1     |
| Cumulus convection          | Grell 3D ensemble scheme<br>(Grell and Dévényi, 2002)                                                                                                        | cu_physics = 5         |
| Gas-phase chemistry         | RACM-KPP<br>(Stockwell et al., 1997b)                                                                                                                        | chem_opt = 103         |
| Photolysis parameterization | Fast-J<br>(Wild et al., 2000)                                                                                                                                | phot_opt = 2           |

**Table 3.** Settings and physical parameterization schemes selected during the WRF-Chem simulations

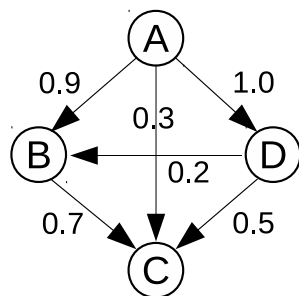

**Figure 1.** Example of a Direct Relation Graph involving four species.

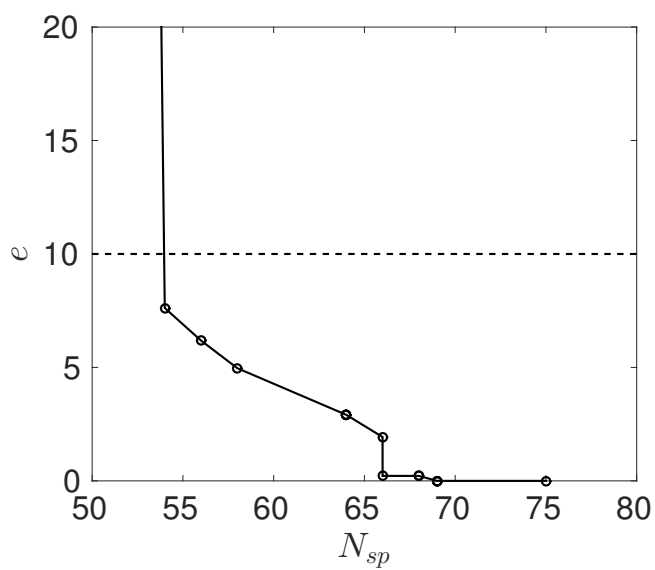

**Figure 2.** Ozone mixing ratio percentage error against number of species in skeletal RACM mechanism.



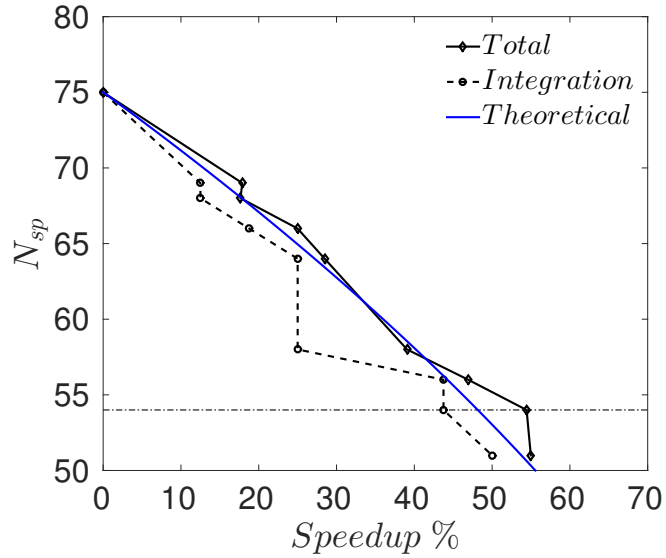

**Figure 3.** Number of species against percentage speedup for total simulation time, and for integrating Eq. 7 alone.

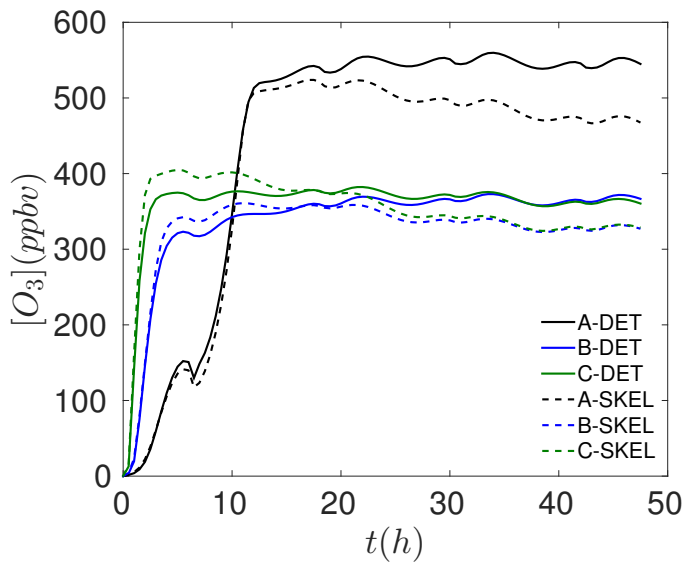

**Figure 4.** Detailed and skeletal ( $N_{sp} = 54$ ) ozone profiles for cases A-C.

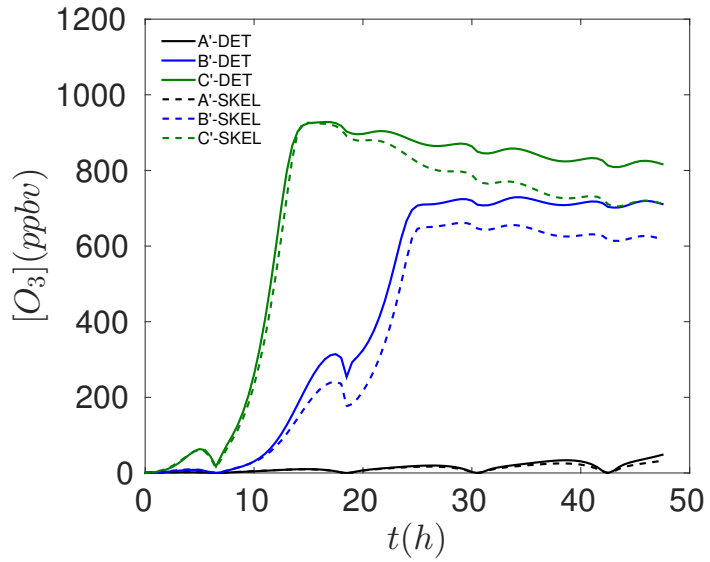

**Figure 5.** Detailed and skeletal ( $N_{sp} = 54$ ) ozone profiles for modified high-NO<sub>x</sub> (x6) cases A'-C'.

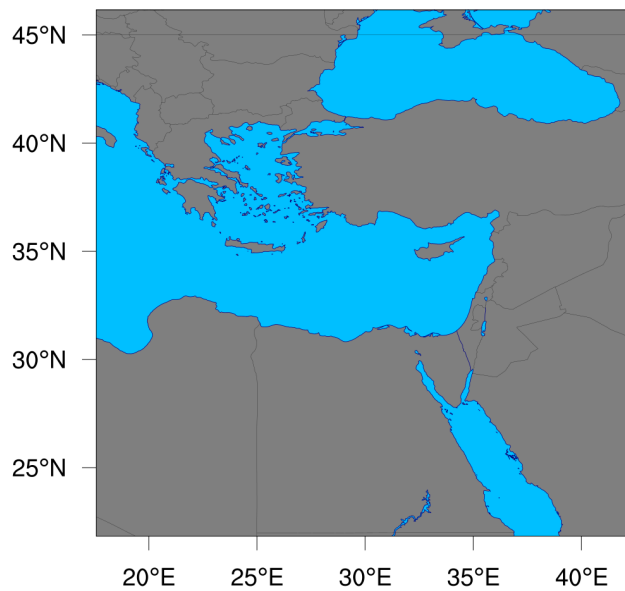

**Figure 6.** The geographic domain utilized during the WRF-Chem simulations conducted in this study. The domain extends between 17.6°E to 42.4°E in the longitude direction, and between 21.9°N to 46.1°N in the latitude direction.

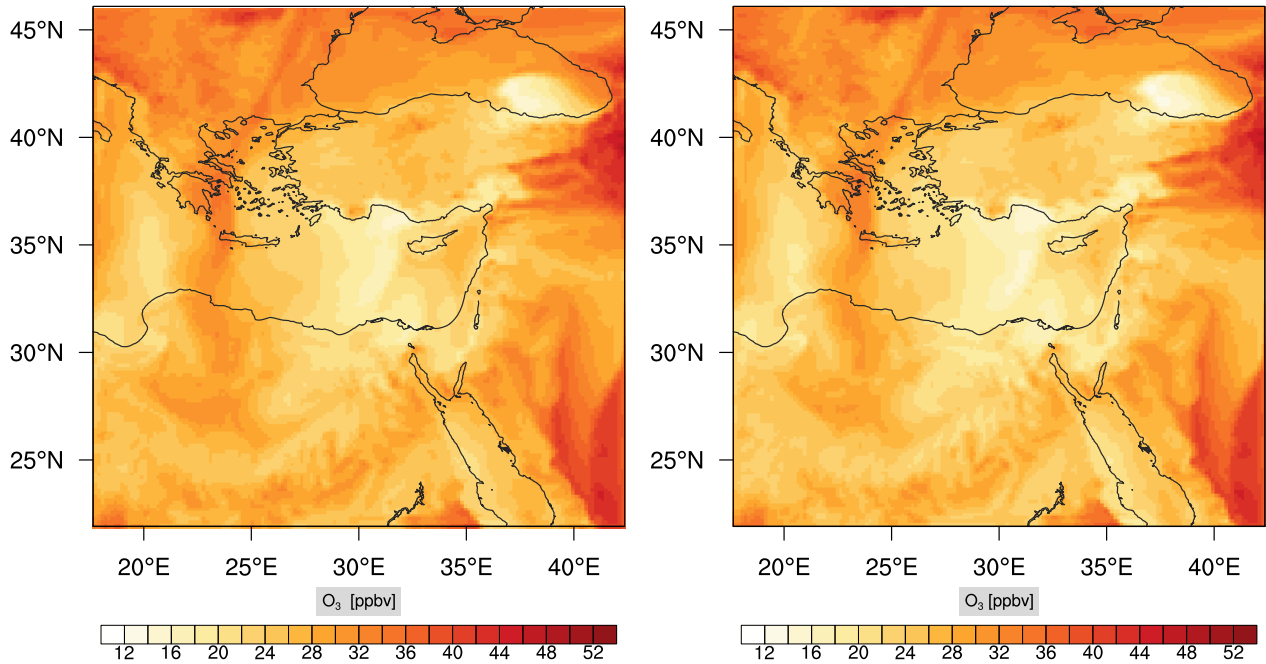

**Figure 7.** Instantaneous comparison of ozone spatial mixing ratio, averaged over the first nine vertical layers, using: the full mechanism (left), and skeletal mechanism (right).

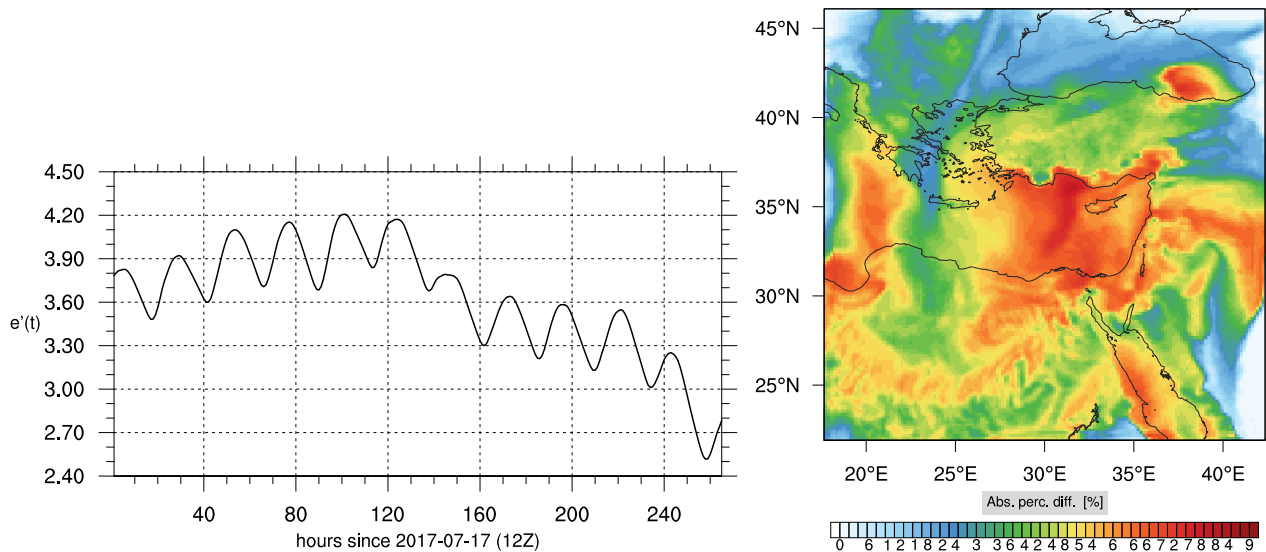

**Figure 8.** The line plot on the left shows the volume-weighted average of the absolute percentage difference between the full and skeletal mechanisms,  $e'(t)$ , for the ozone mixing ratio. The plot on the right depicts the spatial distribution of the absolute percentage difference between the reduced and the full mechanisms, w.r.t. full mechanism, for the ozone mixing ratio when  $e'(t)$  is maximum.

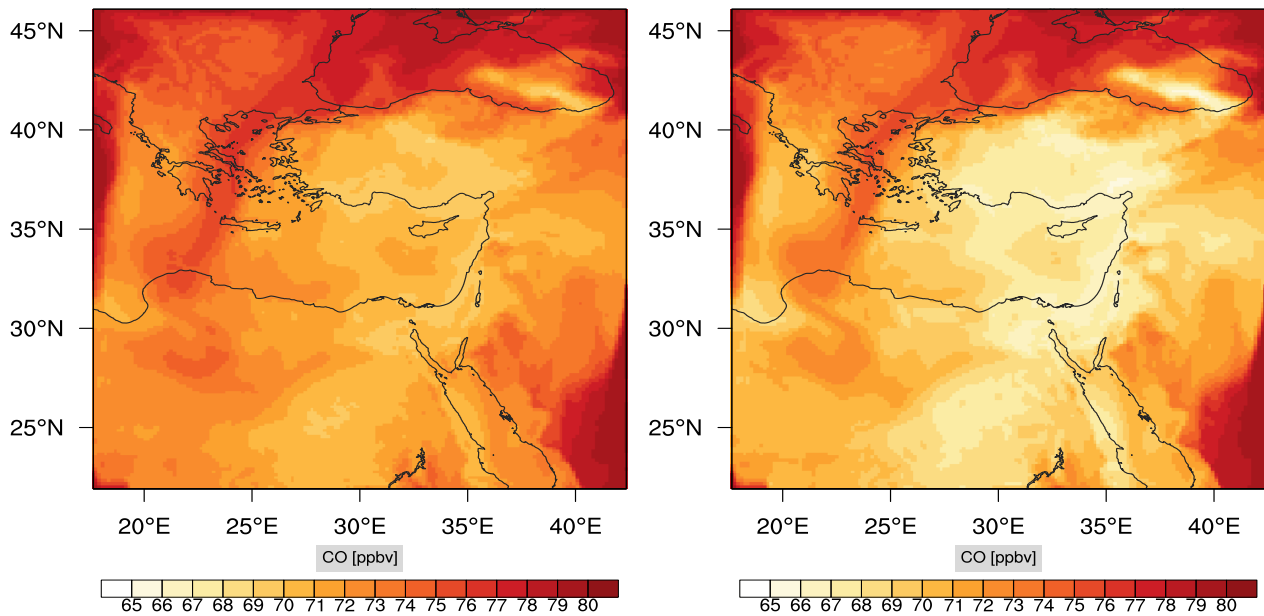

**Figure 9.** Instantaneous comparison of carbon monoxide spatial mixing ratio, averaged over the first nine vertical layers, using: the full mechanism (left), and skeletal mechanism (right).

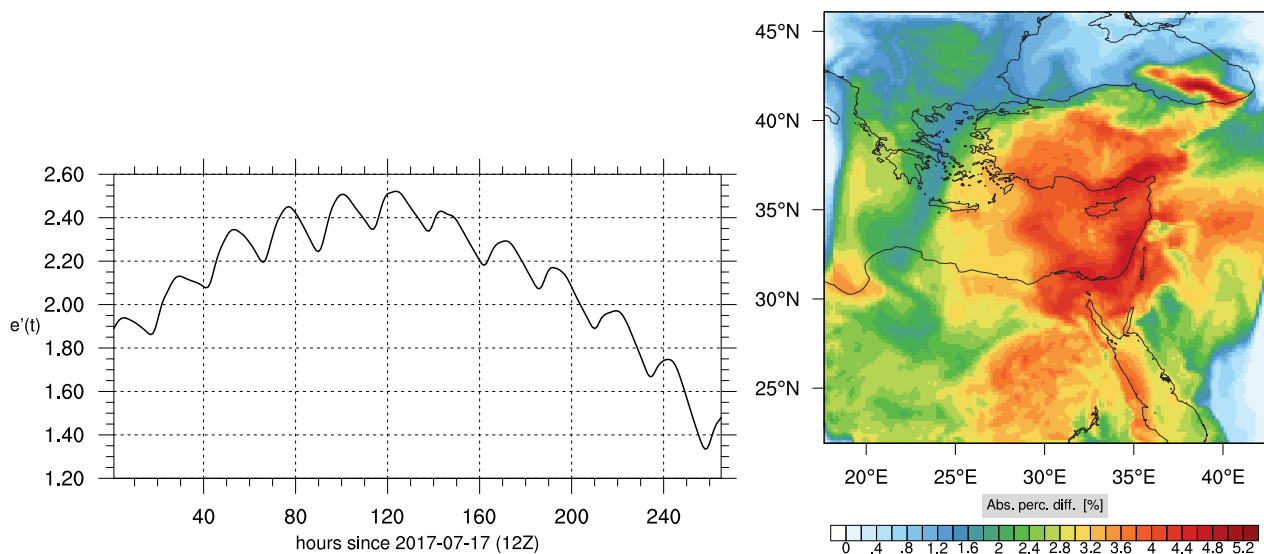

**Figure 10.** The line plot on the left shows the volume-weighted average of the absolute percentage difference between the full and skeletal mechanisms,  $e'(t)$ , for carbon monoxide mixing ratio. The plot on the right depicts the spatial distribution of the absolute percentage difference between the reduced and the full mechanisms, w.r.t. full mechanism, for the CO mixing ratio when  $e'(t)$  is maximum.

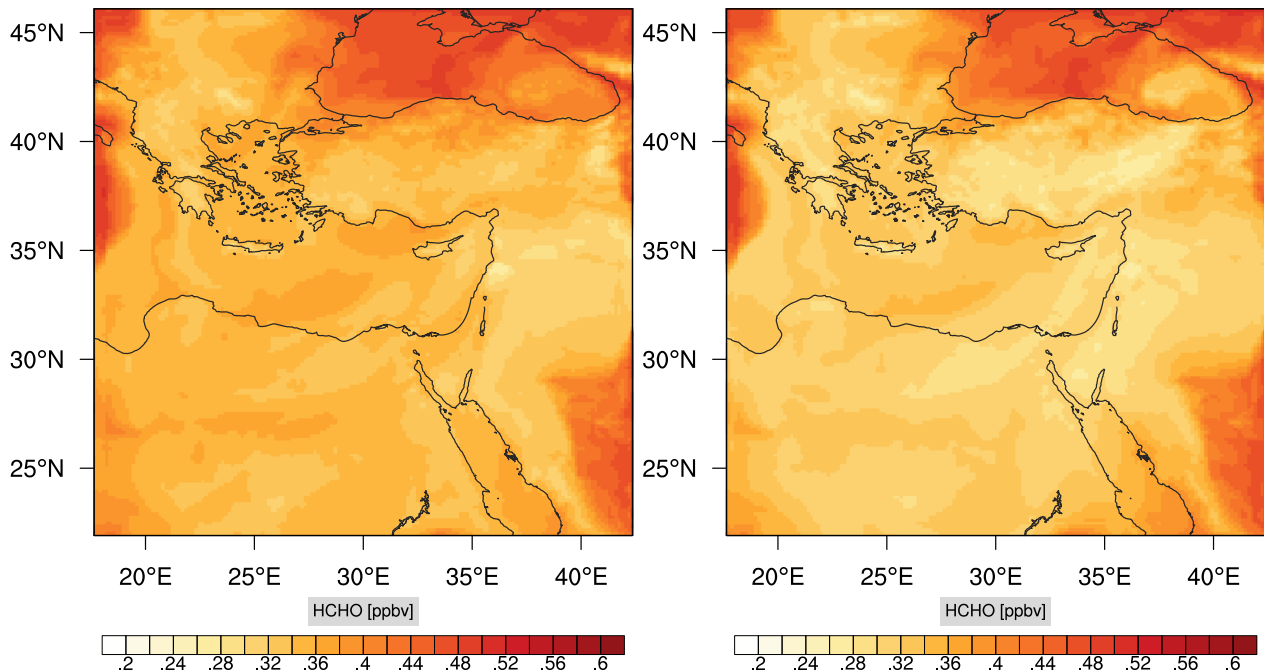

**Figure 11.** Instantaneous comparison of formaldehyde spatial mixing ratio, averaged over the first nine vertical layers, using: the full mechanism (left), and skeletal mechanism (right).

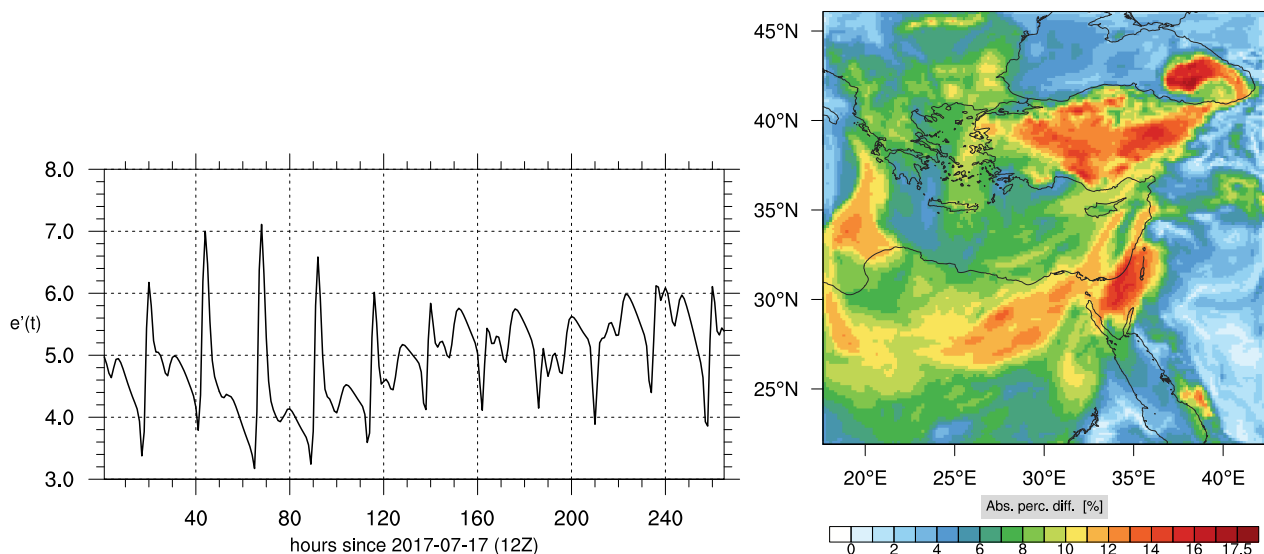

**Figure 12.** The line plot on the left shows the volume-weighted average of the absolute percentage difference between the full and skeletal mechanisms,  $e'(t)$ , for formaldehyde mixing ratio. The plot on the right depicts the spatial distribution of the absolute percentage difference between the reduced and the full mechanisms, w.r.t. full mechanism, for the formaldehyde mixing ratio when  $e'(t)$  is maximum.

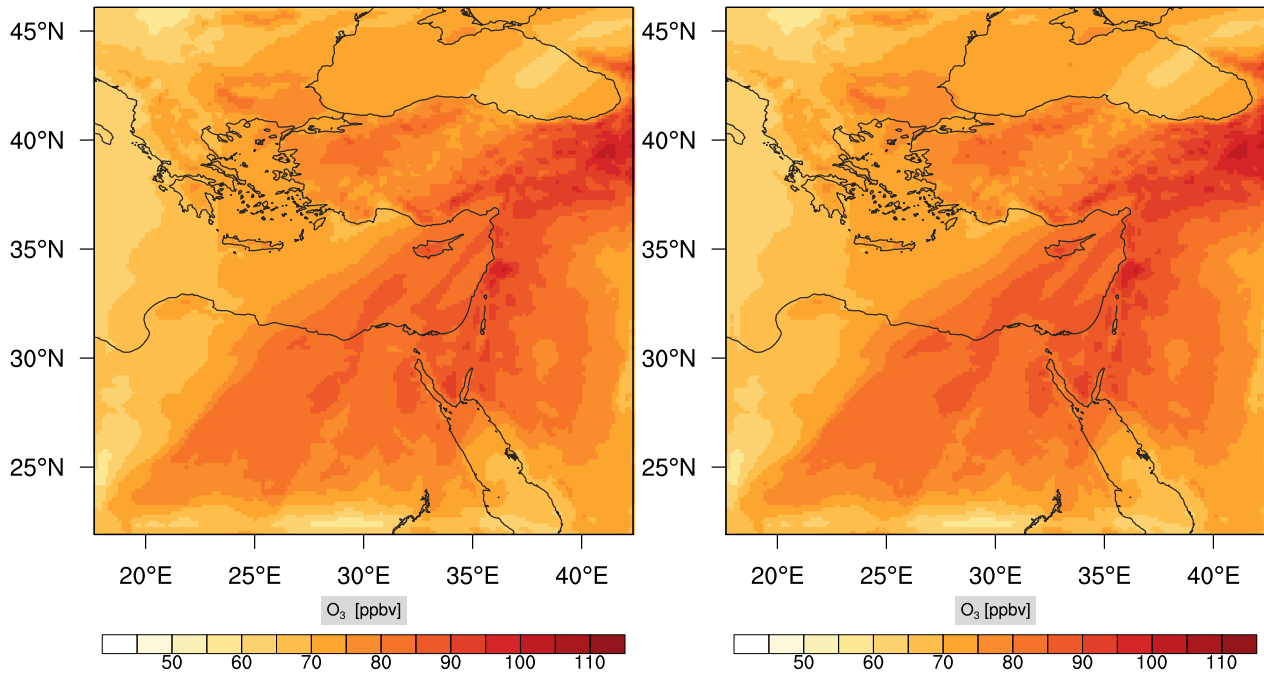

**Figure 13.** Instantaneous comparison of ozone spatial mixing ratio, averaged over the vertical layers 10-22, using: the full mechanism (left), and skeletal mechanism (right).

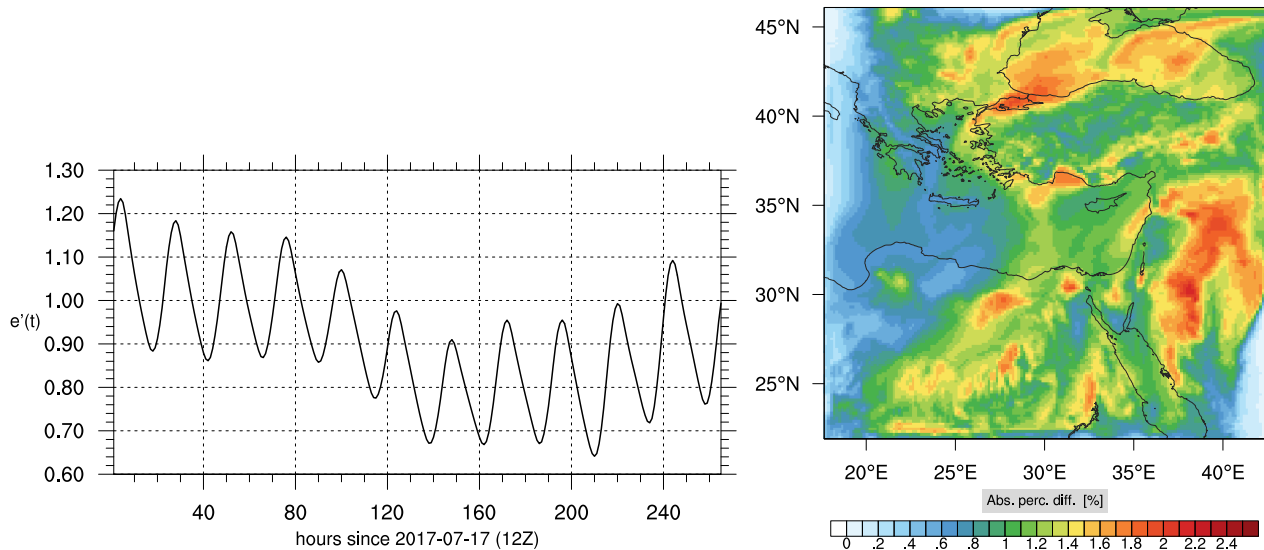

**Figure 14.** The line plot on the left shows the volume-weighted average of the absolute percentage difference between the full and skeletal mechanisms,  $e'(t)$ , for the ozone mixing ratio. The plot on the right depicts the spatial distribution of the absolute percentage difference between the reduced and the full mechanisms, w.r.t. full mechanism, for the ozone mixing ratio when  $e'(t)$  is maximum.

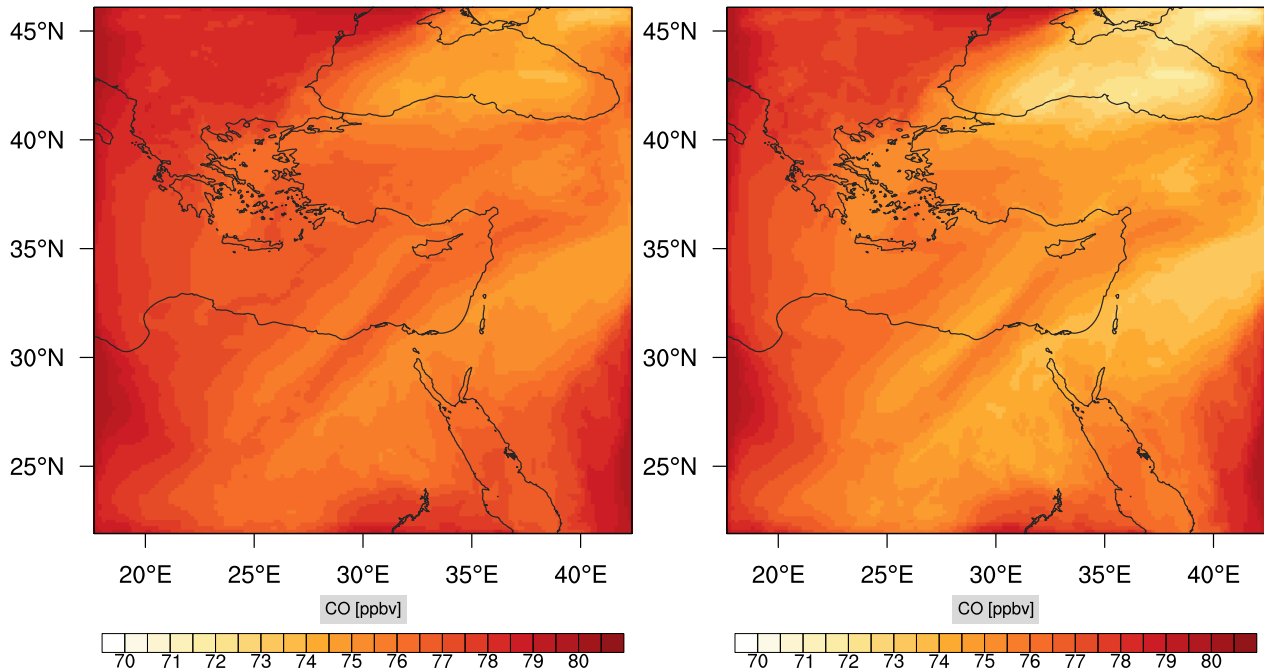

**Figure 15.** Instantaneous comparison of carbon monoxide spatial mixing ratio, averaged over the vertical layers 10-22, using: the full mechanism (left), and skeletal mechanism (right).

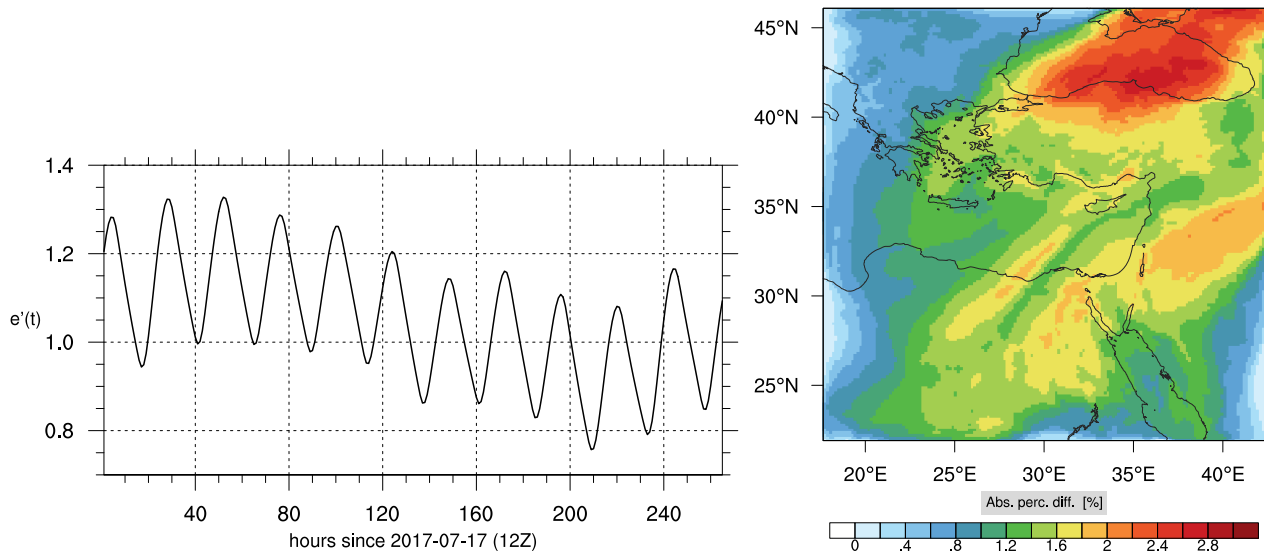

**Figure 16.** The line plot on the left shows the volume-weighted average of the absolute percentage difference between the full and skeletal mechanisms,  $e'(t)$ , for carbon monoxide mixing ratio. The plot on the right depicts the spatial distribution of the absolute percentage difference between the reduced and the full mechanisms, w.r.t. full mechanism, for the CO mixing ratio when  $e'(t)$  is maximum.

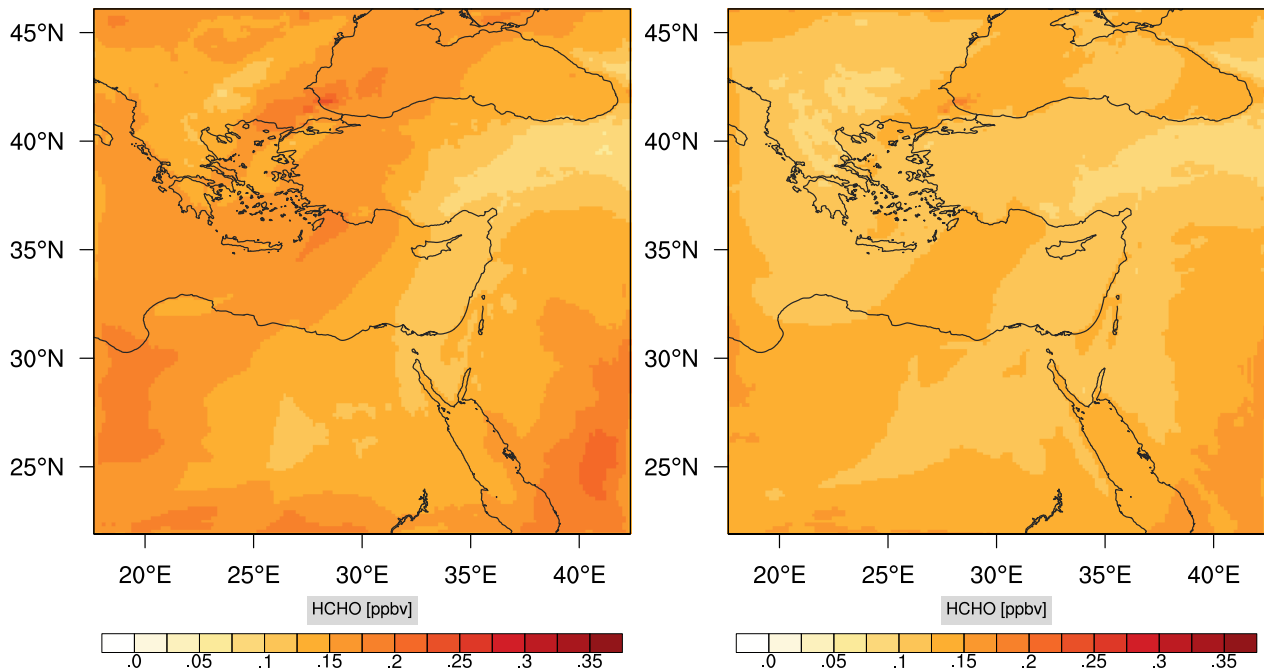

**Figure 17.** Instantaneous comparison of formaldehyde spatial mixing ratio, averaged over the vertical layers 10-22, using: the full mechanism (left), and skeletal mechanism (right).

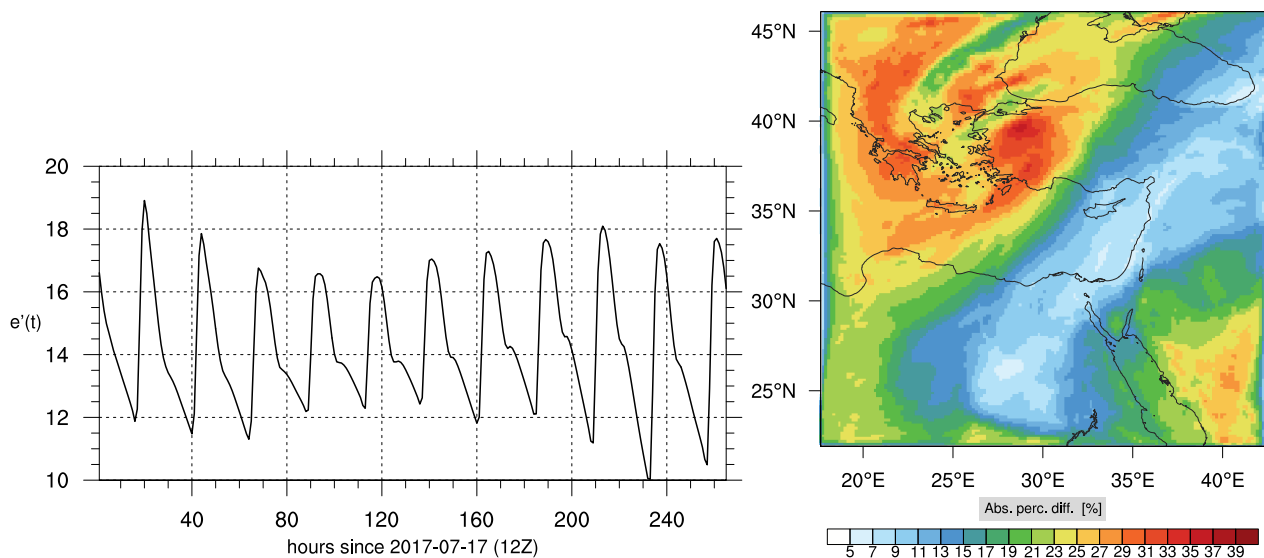

**Figure 18.** The line plot on the left shows the volume-weighted average of the absolute percentage difference between the full and skeletal mechanisms,  $e'(t)$ , for formaldehyde mixing ratio. The plot on the right depicts the spatial distribution of the absolute percentage difference between the reduced and the full mechanisms, w.r.t. full mechanism, for the formaldehyde mixing ratio when  $e'(t)$  is maximum.
